# Supplementary material for: Orthogonal synthesis of a heterodimeric ligand for the development of the GdIII–GaIII ditopic complex as a potential pH-sensitive MRI/PET probe
Source: Royal Society of Chemistry journal article supplement (doi:10.1039/c2ob27200h), 2013-01-01

## ELECTRONIC SUPPLEMENTARY INFORMATION

for

# Orthogonal synthesis of a heterodimeric ligand for the development of the Gd<sup>III</sup>/Ga<sup>III</sup> ditopic complex as potential pH-sensitive MRI/PET probe

**Nikolay Vologdin, Gabriele A. Rolla, Mauro Botta and Lorenzo Tei\***

*Dipartimento di Scienze e Innovazione Tecnologica, Università del Piemonte Orientale "Amedeo  
Avogadro"*

*Viale T. Michel 11, 15121, Alessandria, Italy*

*lorenzo.tei@mfn.unipmn.it*

### **Content:**

- |                                                   |        |
|---------------------------------------------------|--------|
| 1) HPLC methods                                   | pag. 2 |
| 2) <sup>1</sup> H and <sup>13</sup> C NMR spectra | pag. 4 |

## HPLC methods

### Method 1:

Solvent A: H<sub>2</sub>O TFA 0.1%; Solvent B: MeOH TFA 0.1%

HPLC gradient conditions, at flow: 1 ml/min

| Time (min) | Solvent A (%) | Solvent B (%) |
|------------|---------------|---------------|
| 0          | 25            | 75            |
| 15         | 0             | 100           |
| 17         | 0             | 100           |

### Method 2:

Solvent A: H<sub>2</sub>O TFA 0.1%; Solvent B: MeOH TFA 0.1%

HPLC gradient conditions, at flow: 1 ml/min

| Time (min) | Solvent A (%) | Solvent B (%) |
|------------|---------------|---------------|
| 0          | 30            | 70            |
| 10         | 20            | 80            |
| 15         | 0             | 100           |

### Method 3:

Solvent A: H<sub>2</sub>O TFA 0.1%; Solvent B: MeOH TFA 0.1%

HPLC gradient conditions, at flow: 1 ml/min

| Time (min) | Solvent A (%) | Solvent B (%) |
|------------|---------------|---------------|
| 0          | 20            | 80            |
| 15         | 0             | 100           |
| 17         | 0             | 100           |

### Method 4:

Solvent A: H<sub>2</sub>O TFA 0.1%; Solvent B: MeOH TFA 0.1%

HPLC gradient conditions, at flow: 1 ml/min

| Time (min) | Solvent A (%) | Solvent B (%) |
|------------|---------------|---------------|
| 0          | 100           | 0             |
| 5          | 100           | 0             |
| 8          | 90            | 10            |
| 12         | 90            | 10            |
| 14         | 0             | 100           |

**Method 5:**

Solvent A: H<sub>2</sub>O TFA 0.1%; Solvent B: MeOH TFA 0.1%

HPLC gradient conditions, at flow: 20 ml/min

| Time (min) | Solvent A (%) | Solvent B (%) |
|------------|---------------|---------------|
| 0          | 30            | 70            |
| 6.67       | 20            | 80            |
| 10         | 0             | 100           |

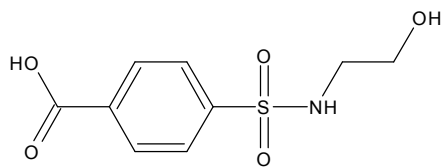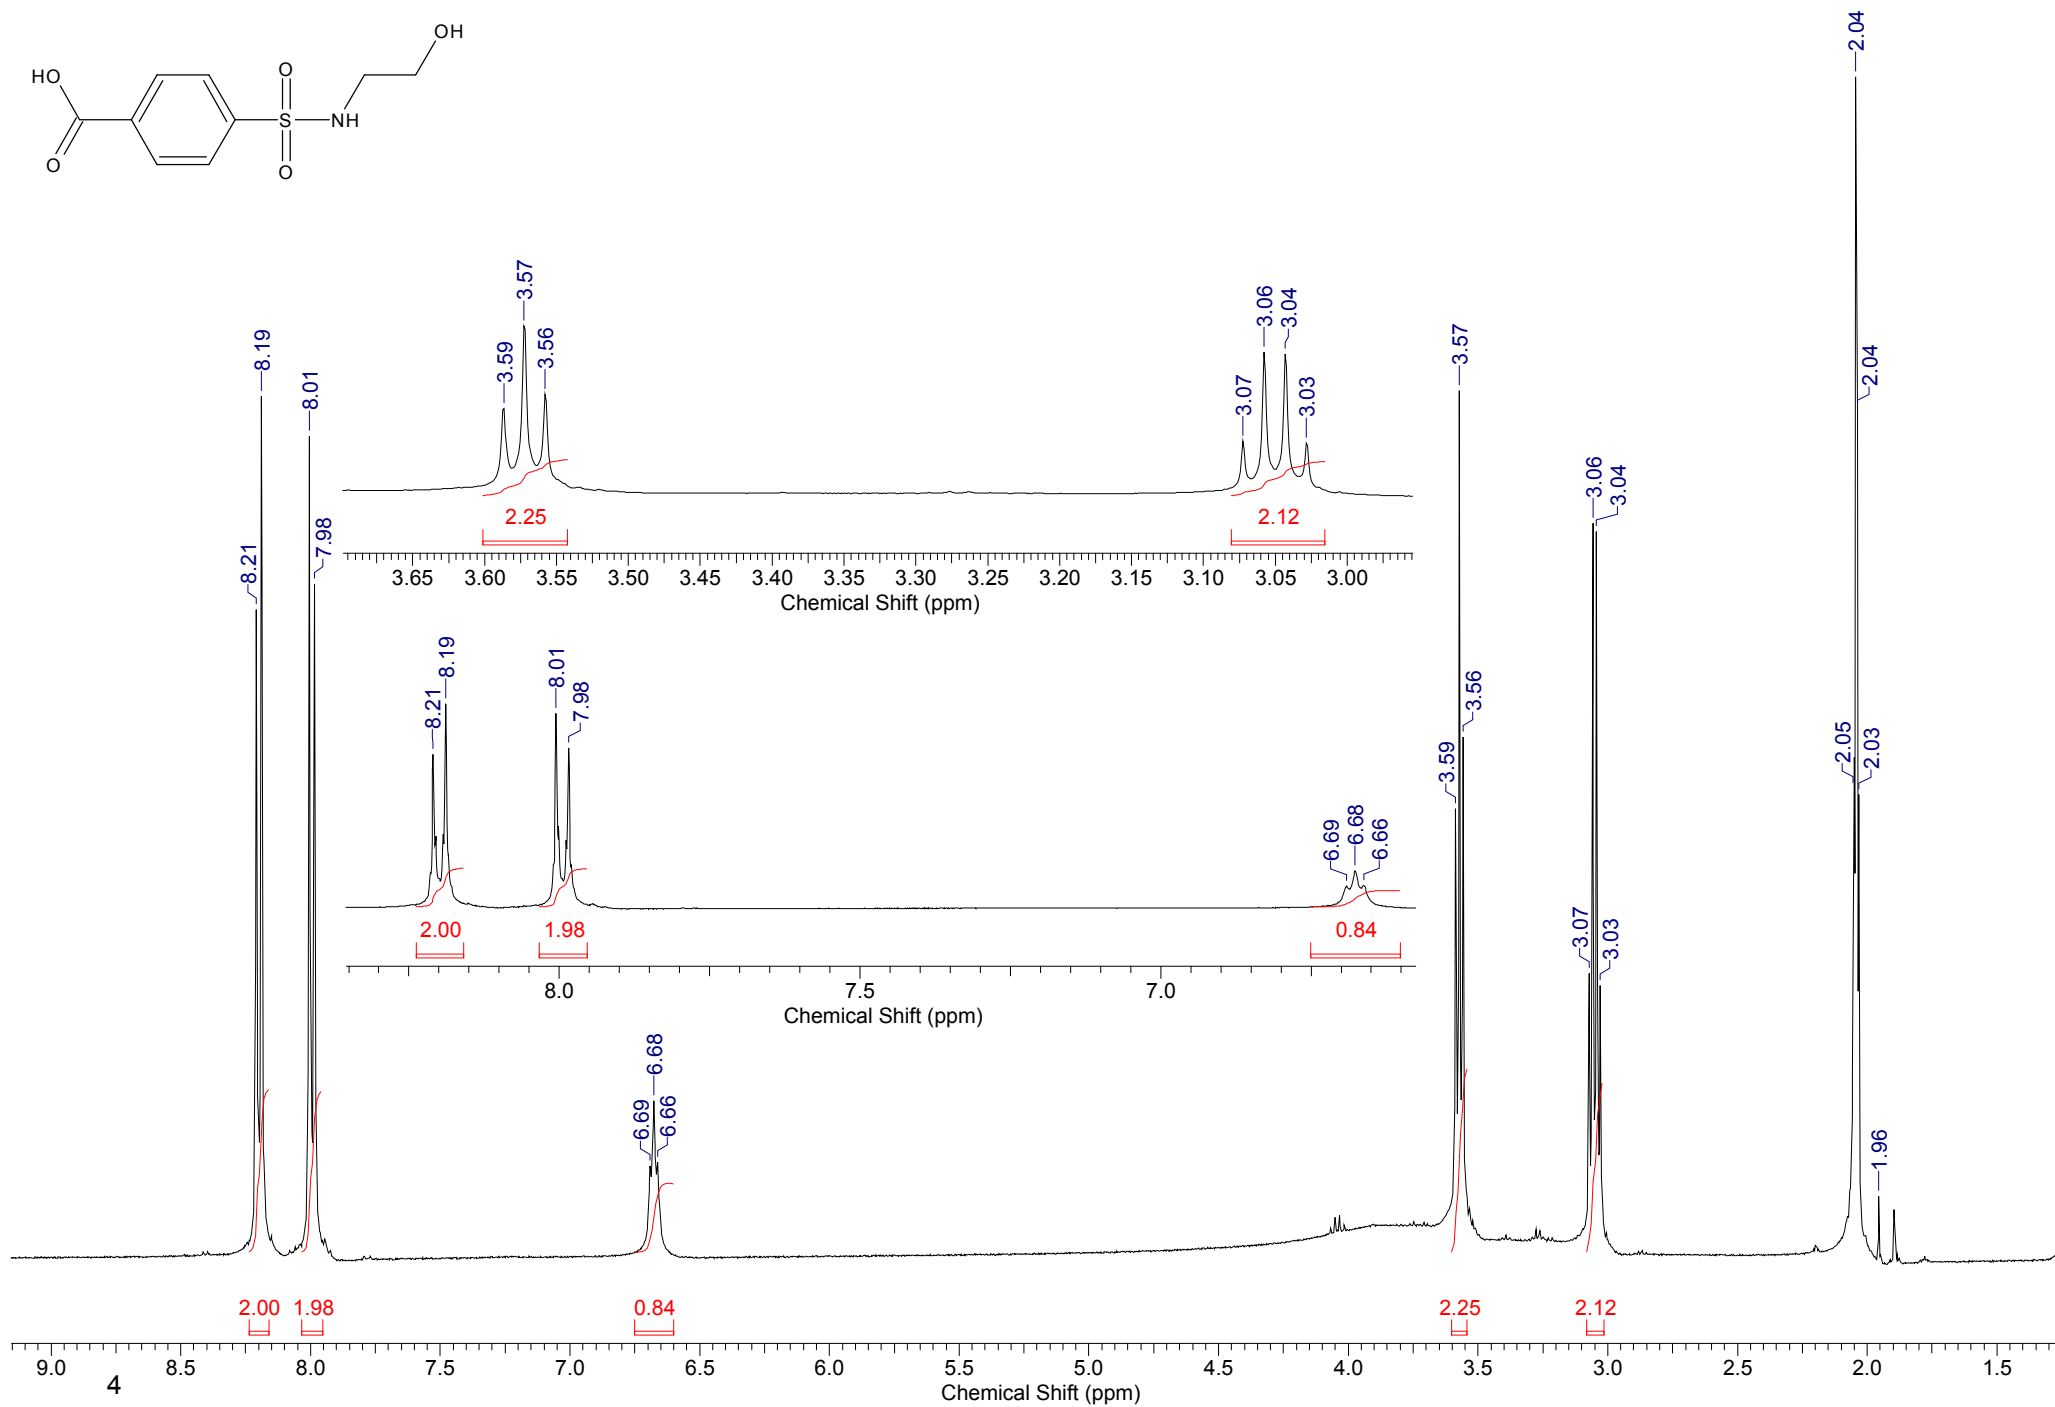

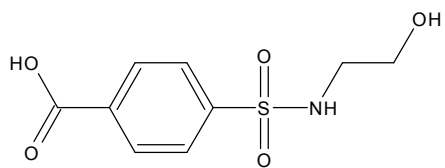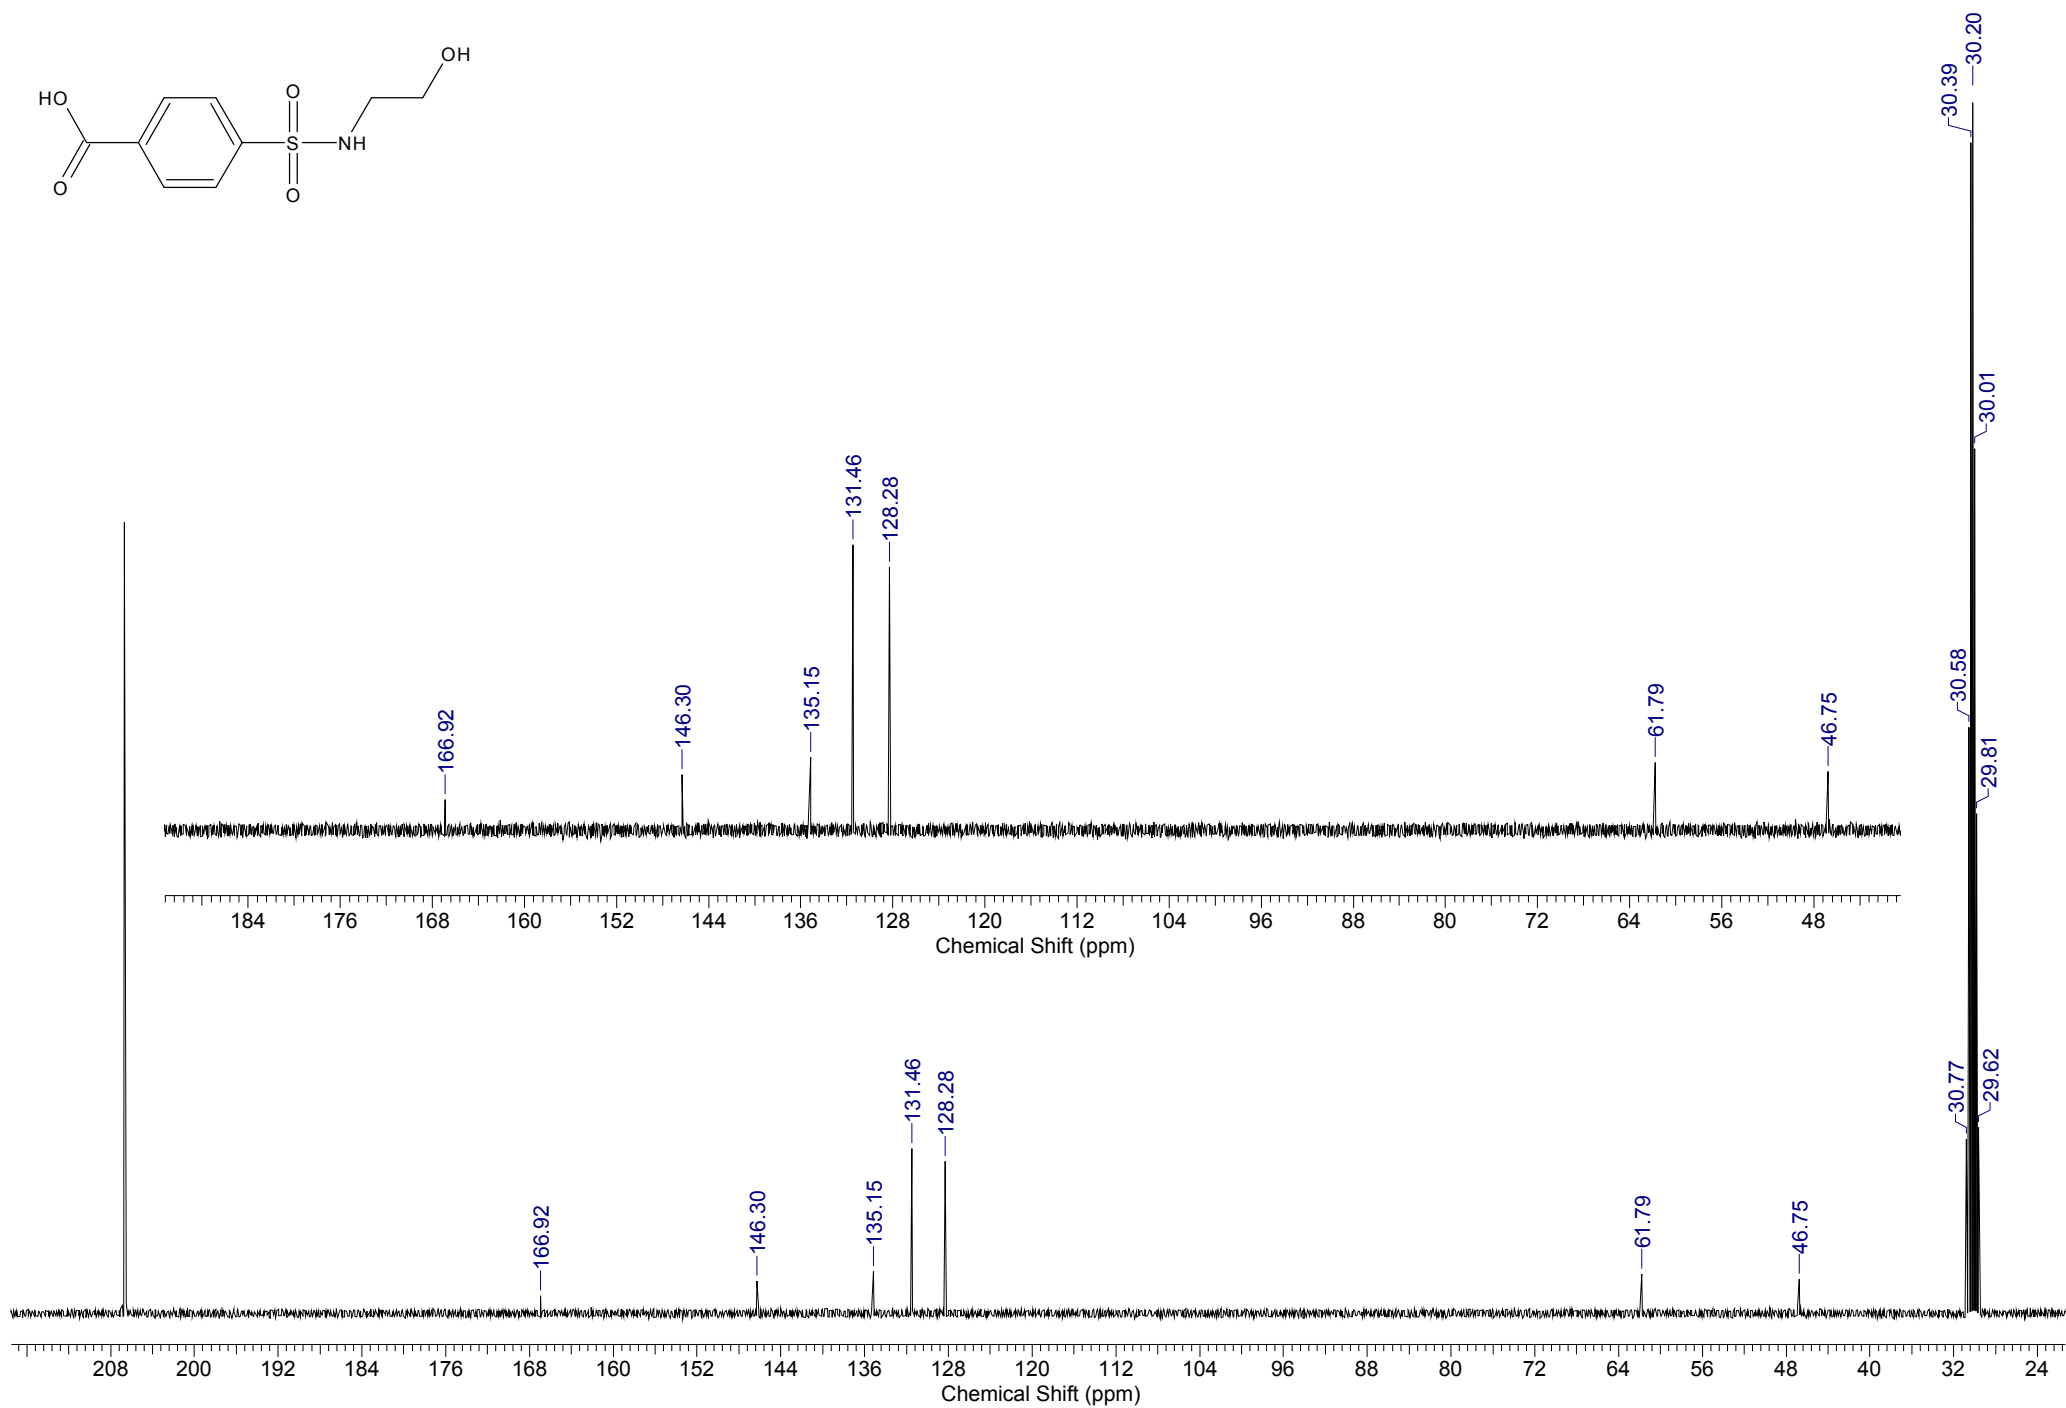

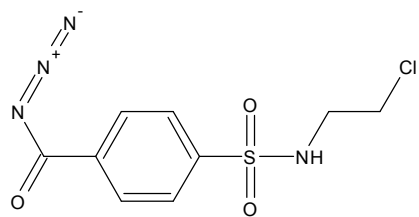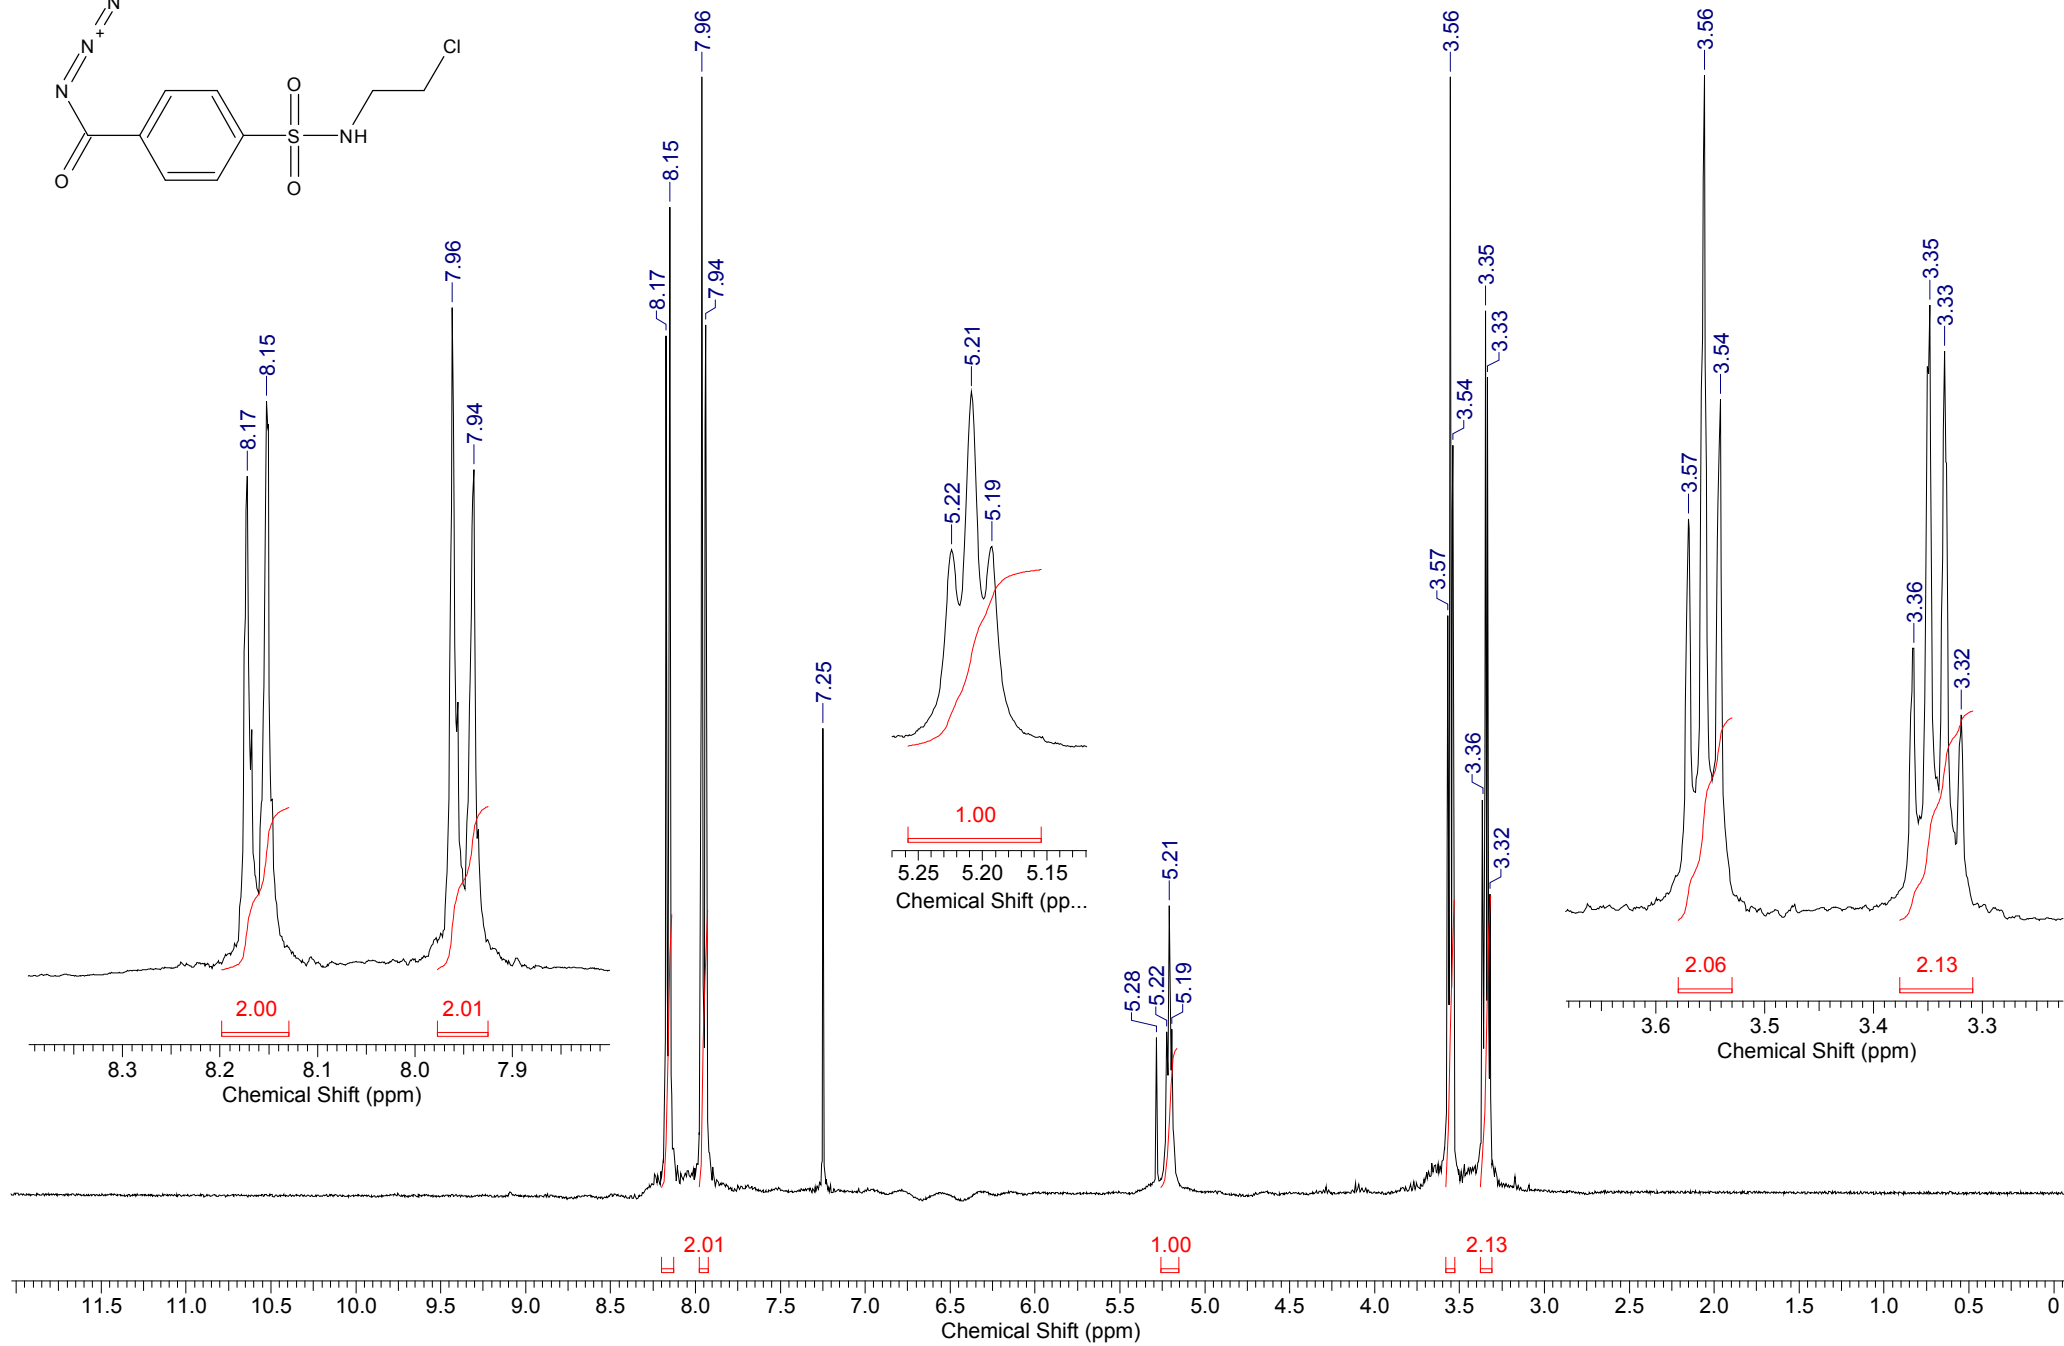

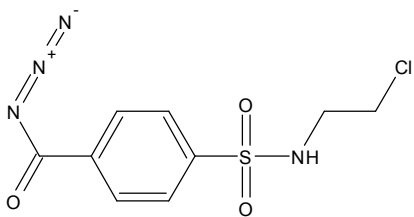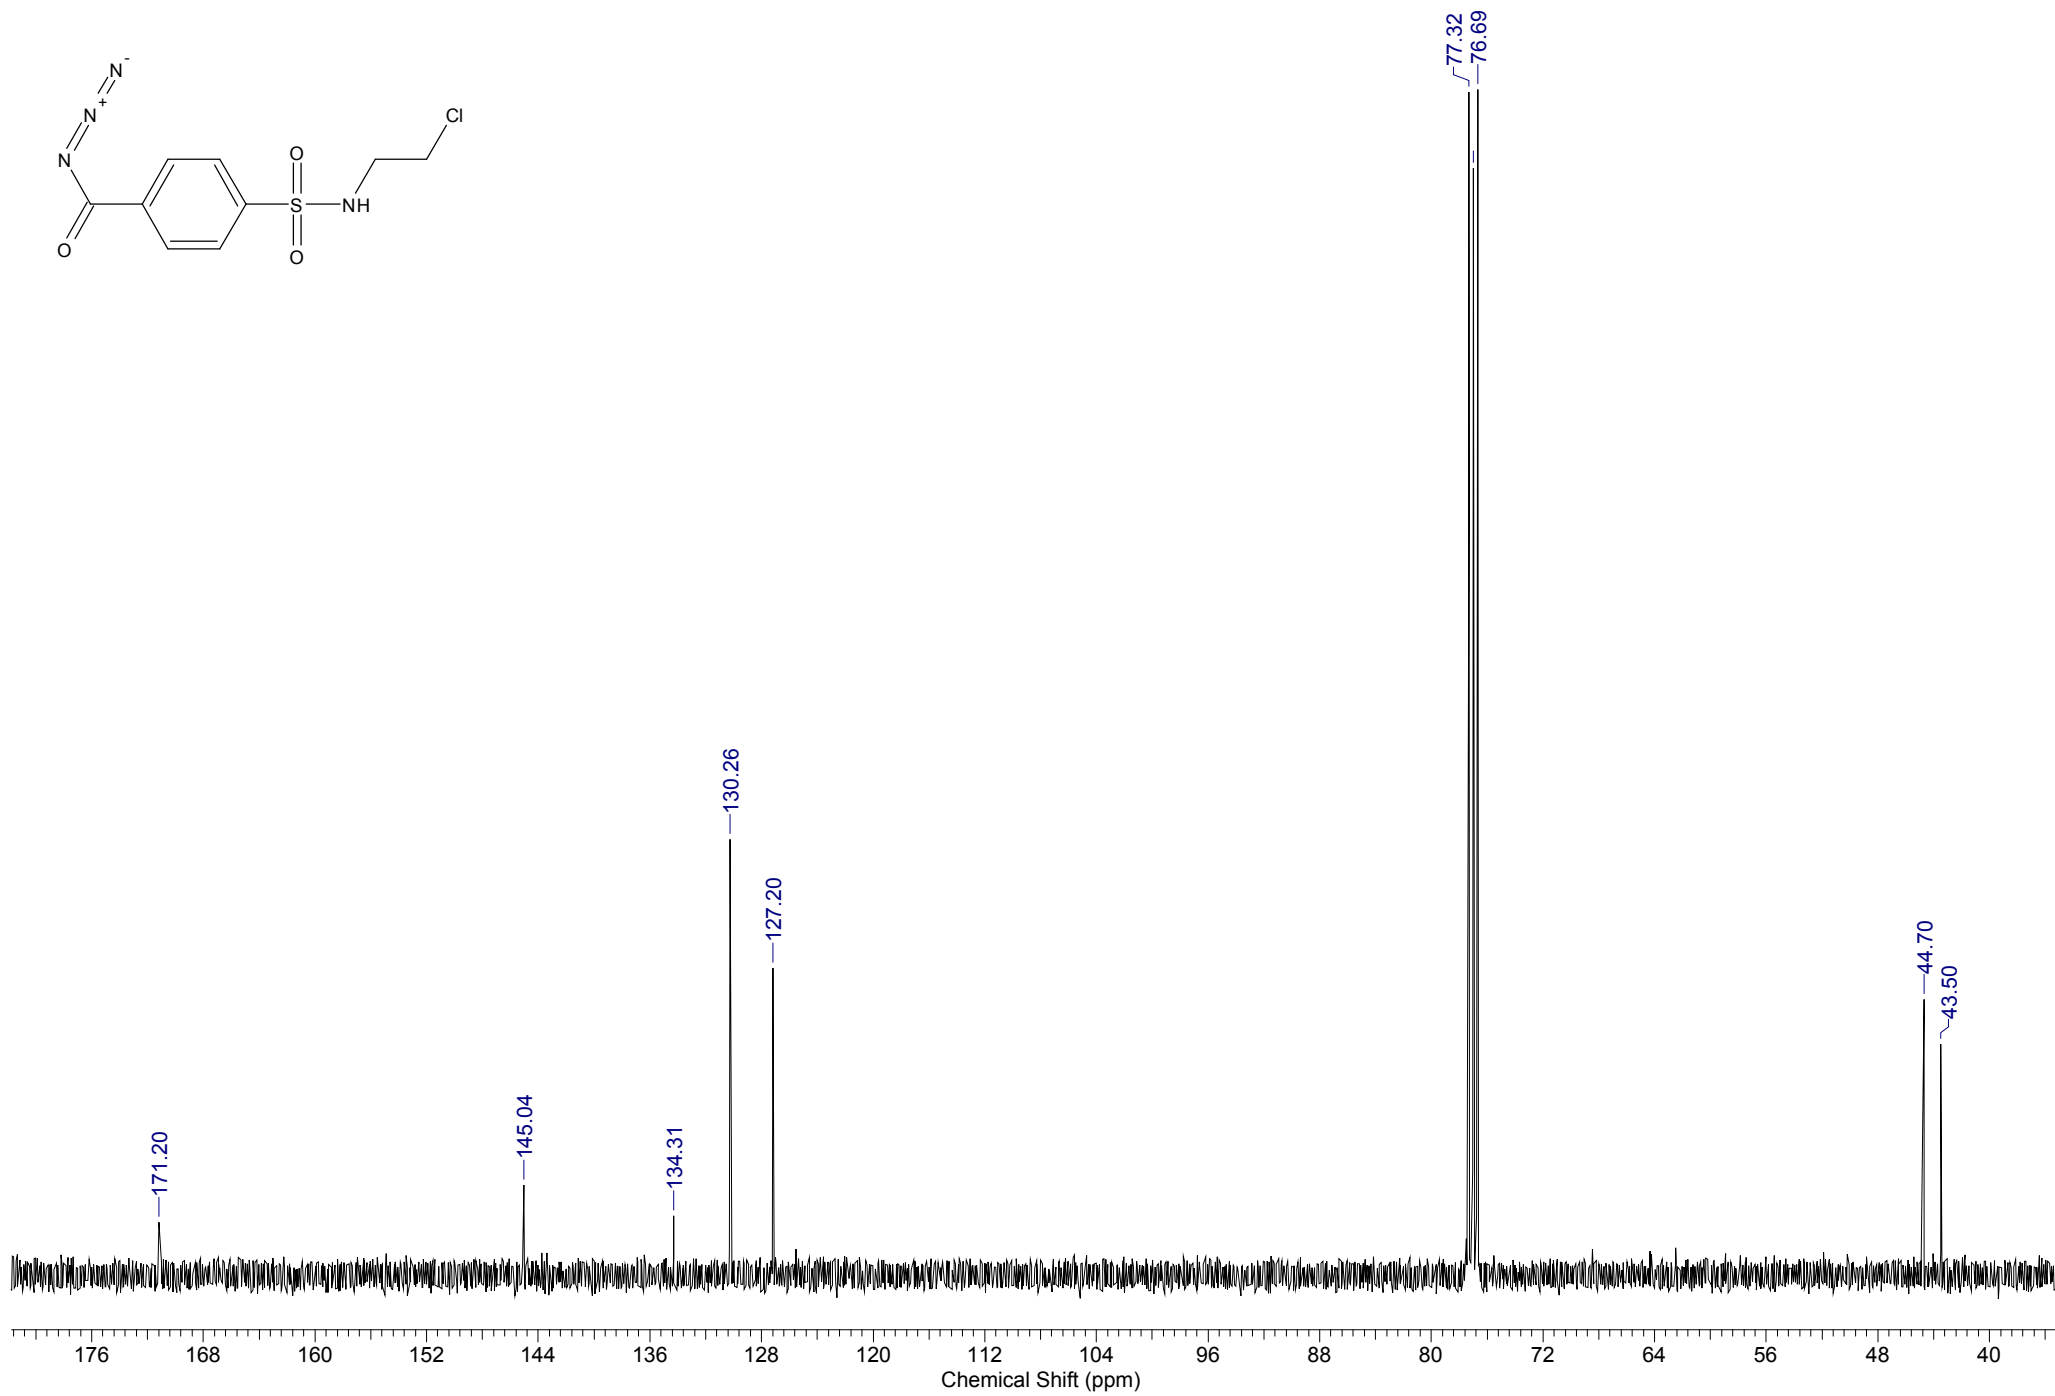

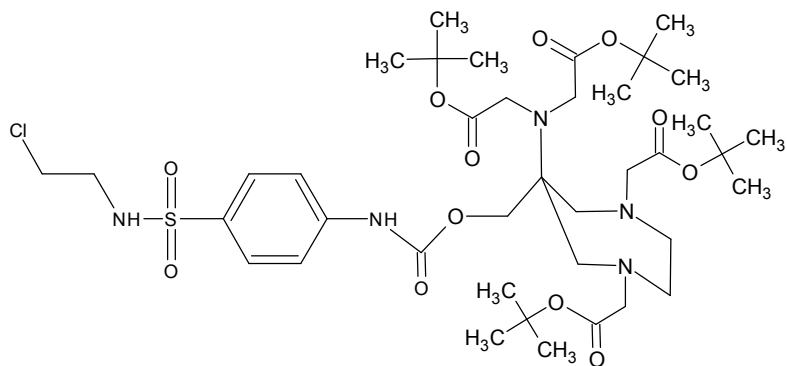

| No. | (ppm)          | Value  | Absolute Value |
|-----|----------------|--------|----------------|
| 1   | [1.43 .. 1.44] | 37.289 | 6.82290e+13    |
| 2   | [2.80 .. 2.86] | 2.863  | 5.23930e+12    |
| 3   | [2.93 .. 3.02] | 4.118  | 7.53516e+12    |
| 4   | [3.10 .. 3.16] | 1.396  | 2.55446e+12    |
| 5   | [3.20 .. 3.27] | 2.127  | 3.89110e+12    |
| 6   | [3.31 .. 3.34] | 3.501  | 6.40495e+12    |
| 7   | [3.58 .. 3.63] | 1.537  | 2.81220e+12    |
| 8   | [3.72 .. 3.75] | 3.648  | 6.67443e+12    |
| 9   | [4.27 .. 4.30] | 1.643  | 3.00558e+12    |
| 10  | [6.77 .. 6.84] | 0.826  | 1.51111e+12    |
| 11  | [7.74 .. 7.79] | 1.509  | 2.76021e+12    |
| 12  | [7.79 .. 7.83] | 2.001  | 3.66034e+12    |

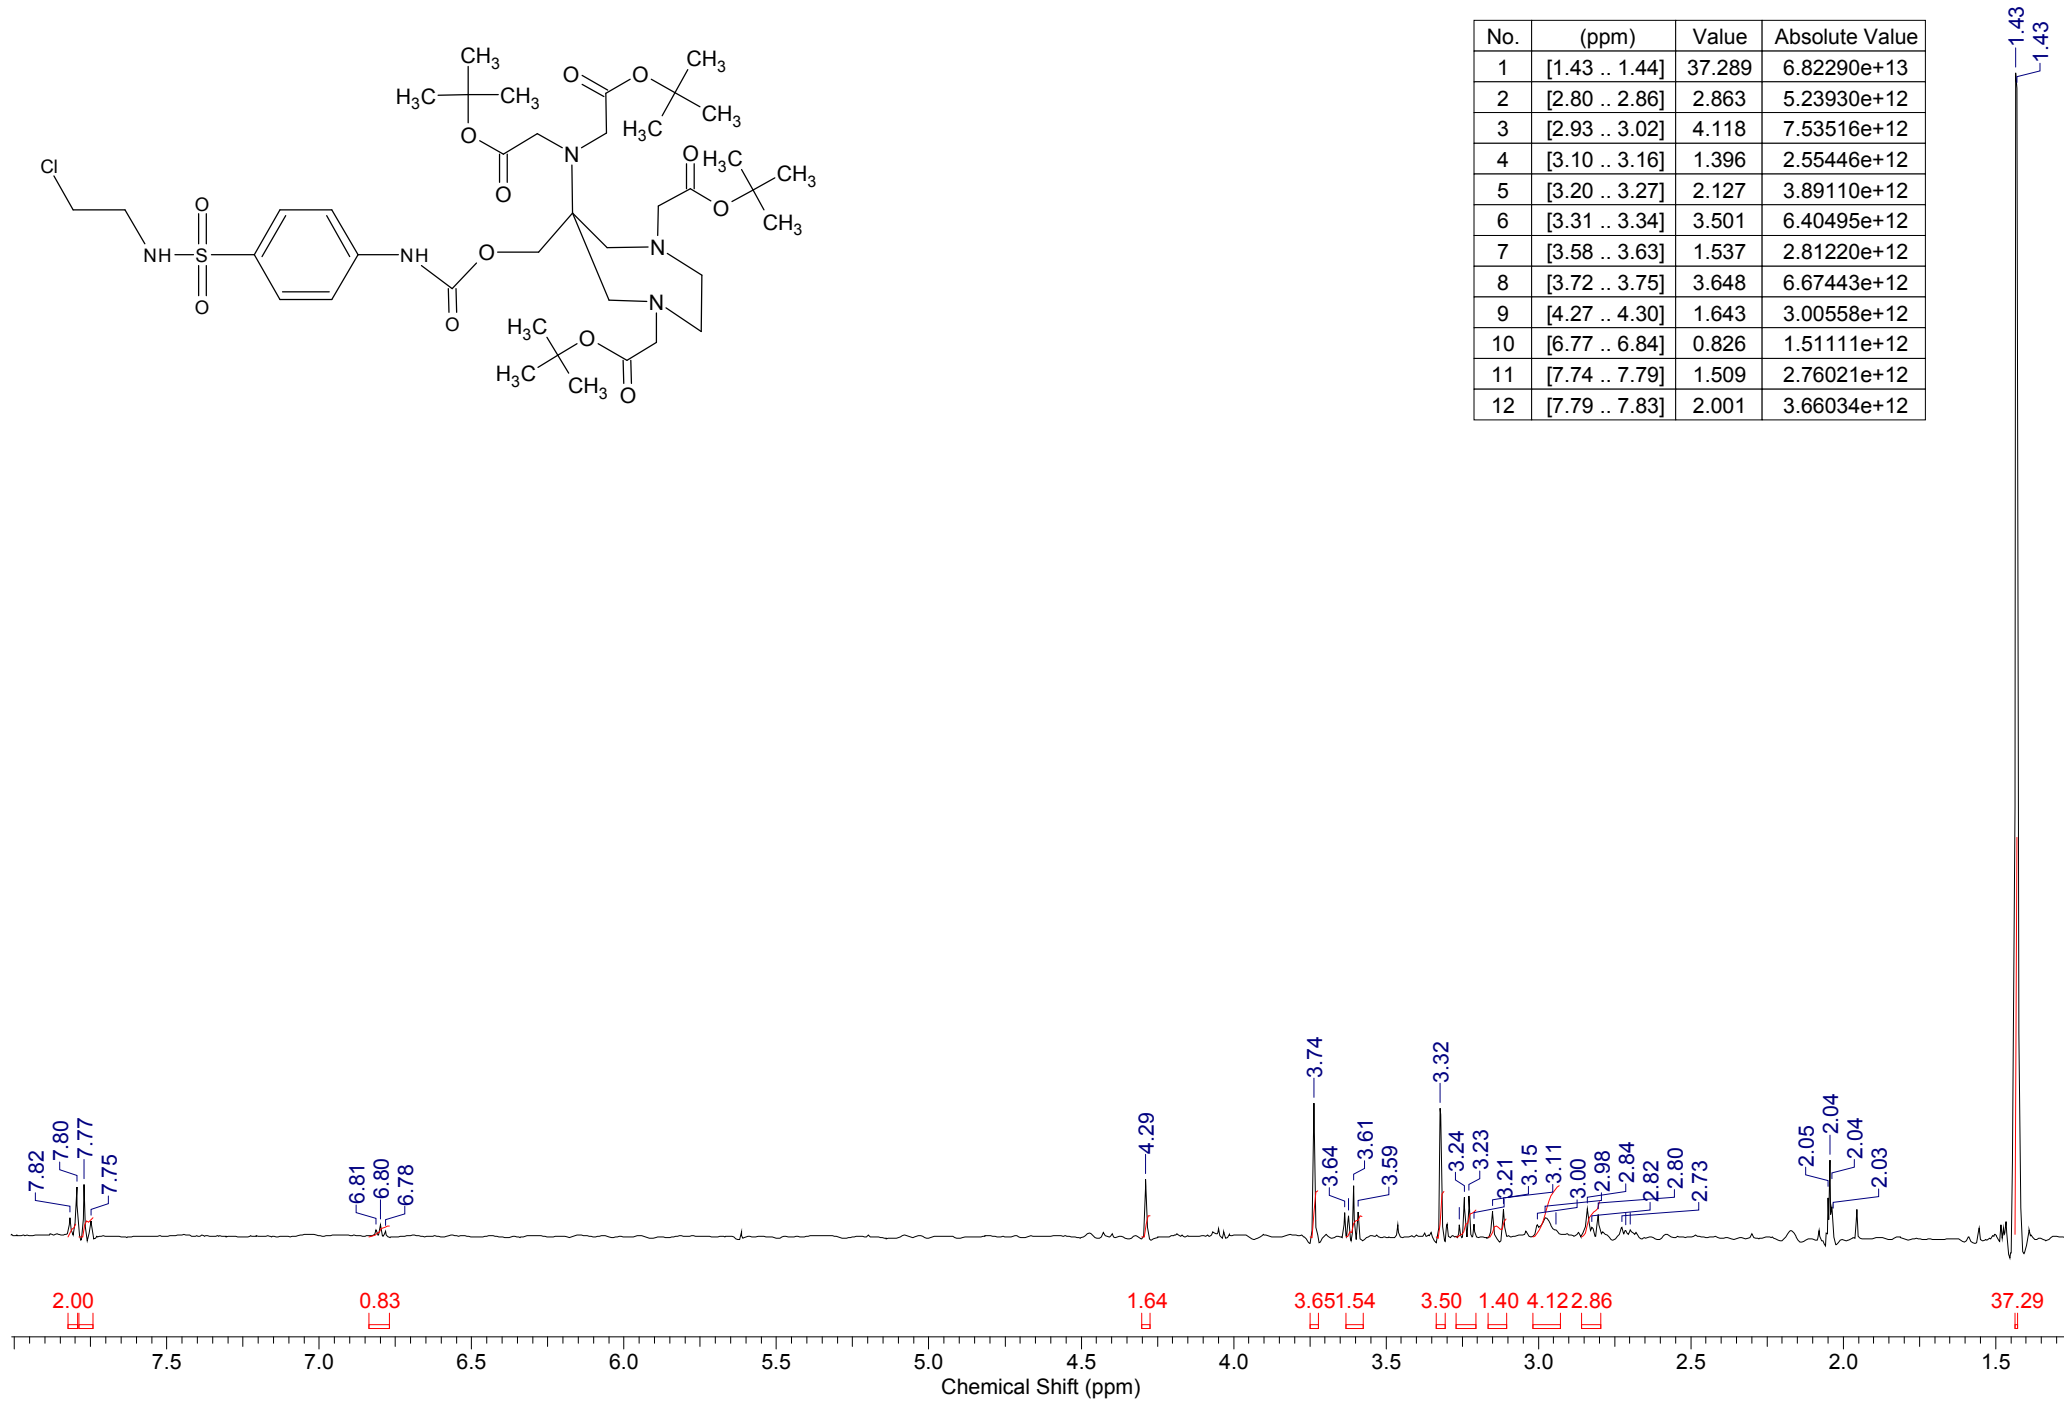



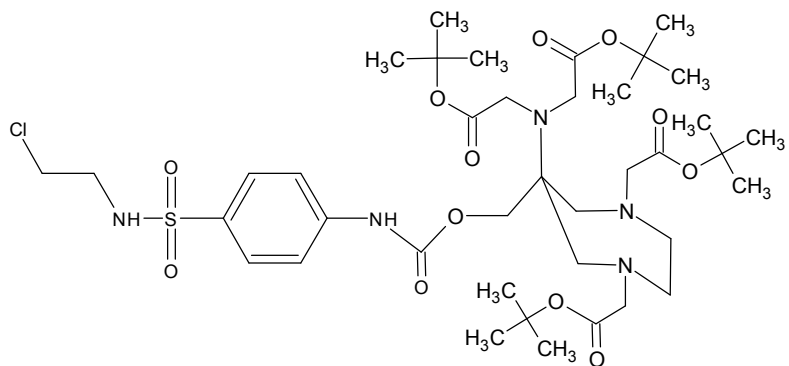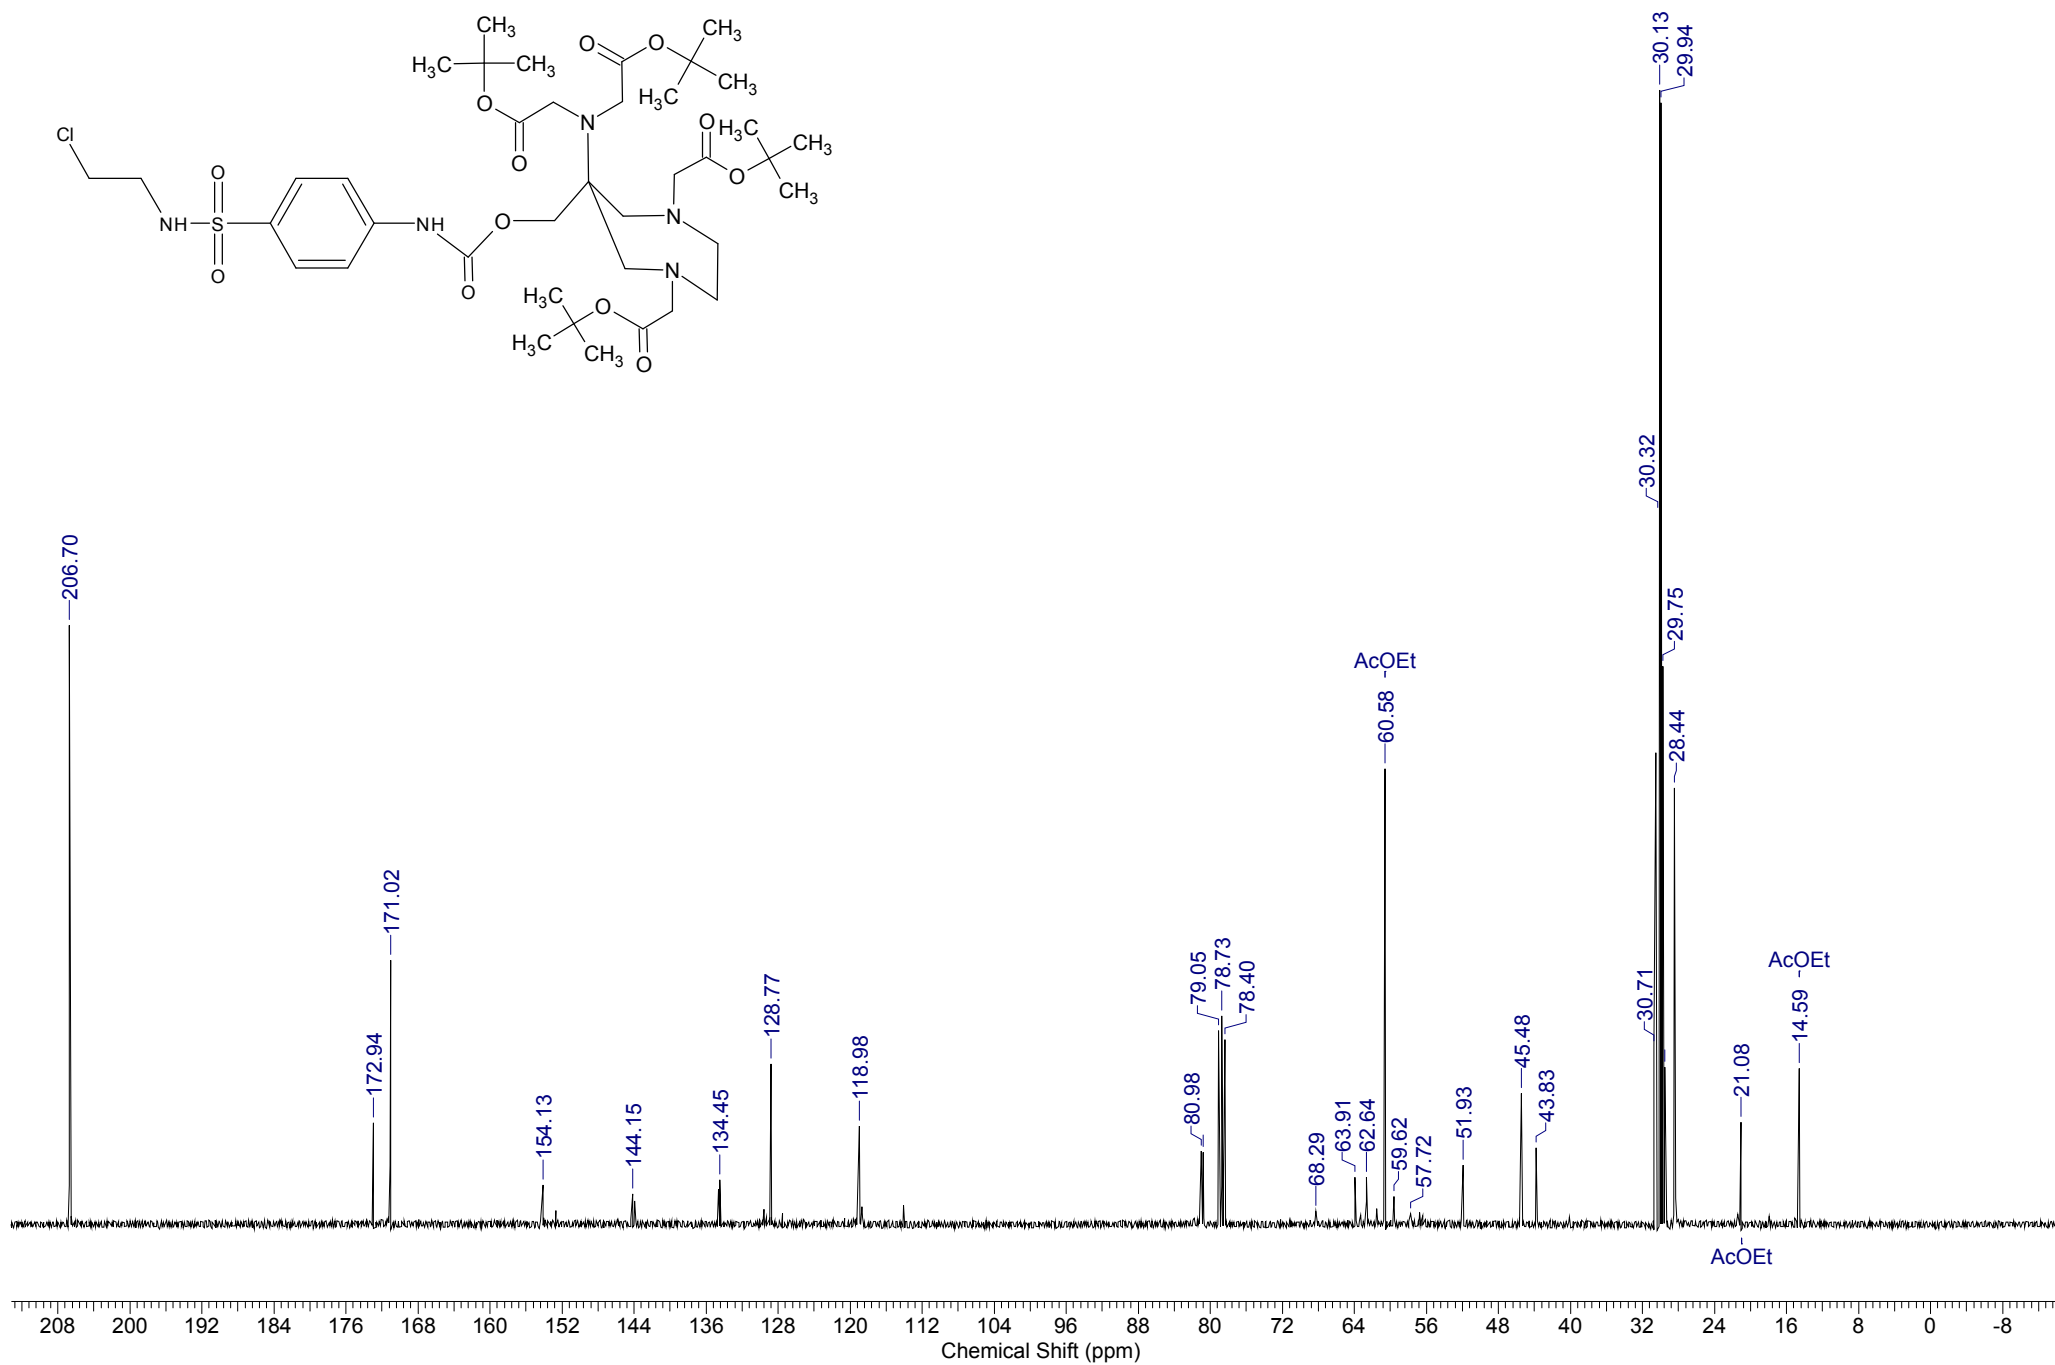

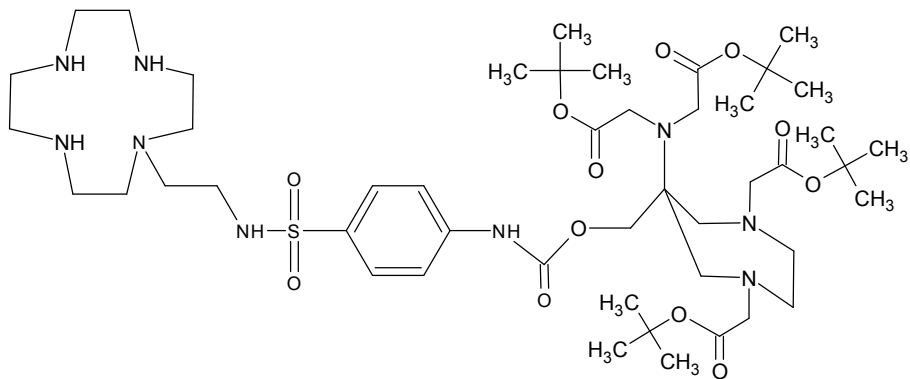

| No. | (ppm)          | Value  | Absolute Value |
|-----|----------------|--------|----------------|
| 1   | [1.37 .. 1.39] | 36.357 | 1.73412e+12    |
| 2   | [2.51 .. 2.55] | 4.301  | 2.05126e+11    |
| 3   | [2.57 .. 2.63] | 8.022  | 3.82640e+11    |
| 4   | [2.69 .. 2.72] | 2.158  | 1.02953e+11    |
| 5   | [2.72 .. 2.79] | 8.005  | 3.81810e+11    |
| 6   | [2.83 .. 2.96] | 4.220  | 2.01264e+11    |
| 7   | [2.98 .. 3.09] | 2.445  | 1.16617e+11    |
| 8   | [3.18 .. 3.23] | 4.066  | 1.93948e+11    |
| 9   | [3.63 .. 3.67] | 3.960  | 1.88887e+11    |
| 10  | [4.14 .. 4.21] | 2.140  | 1.02064e+11    |
| 11  | [7.48 .. 7.54] | 2.045  | 9.75365e+10    |
| 12  | [7.69 .. 7.75] | 2.000  | 9.53957e+10    |

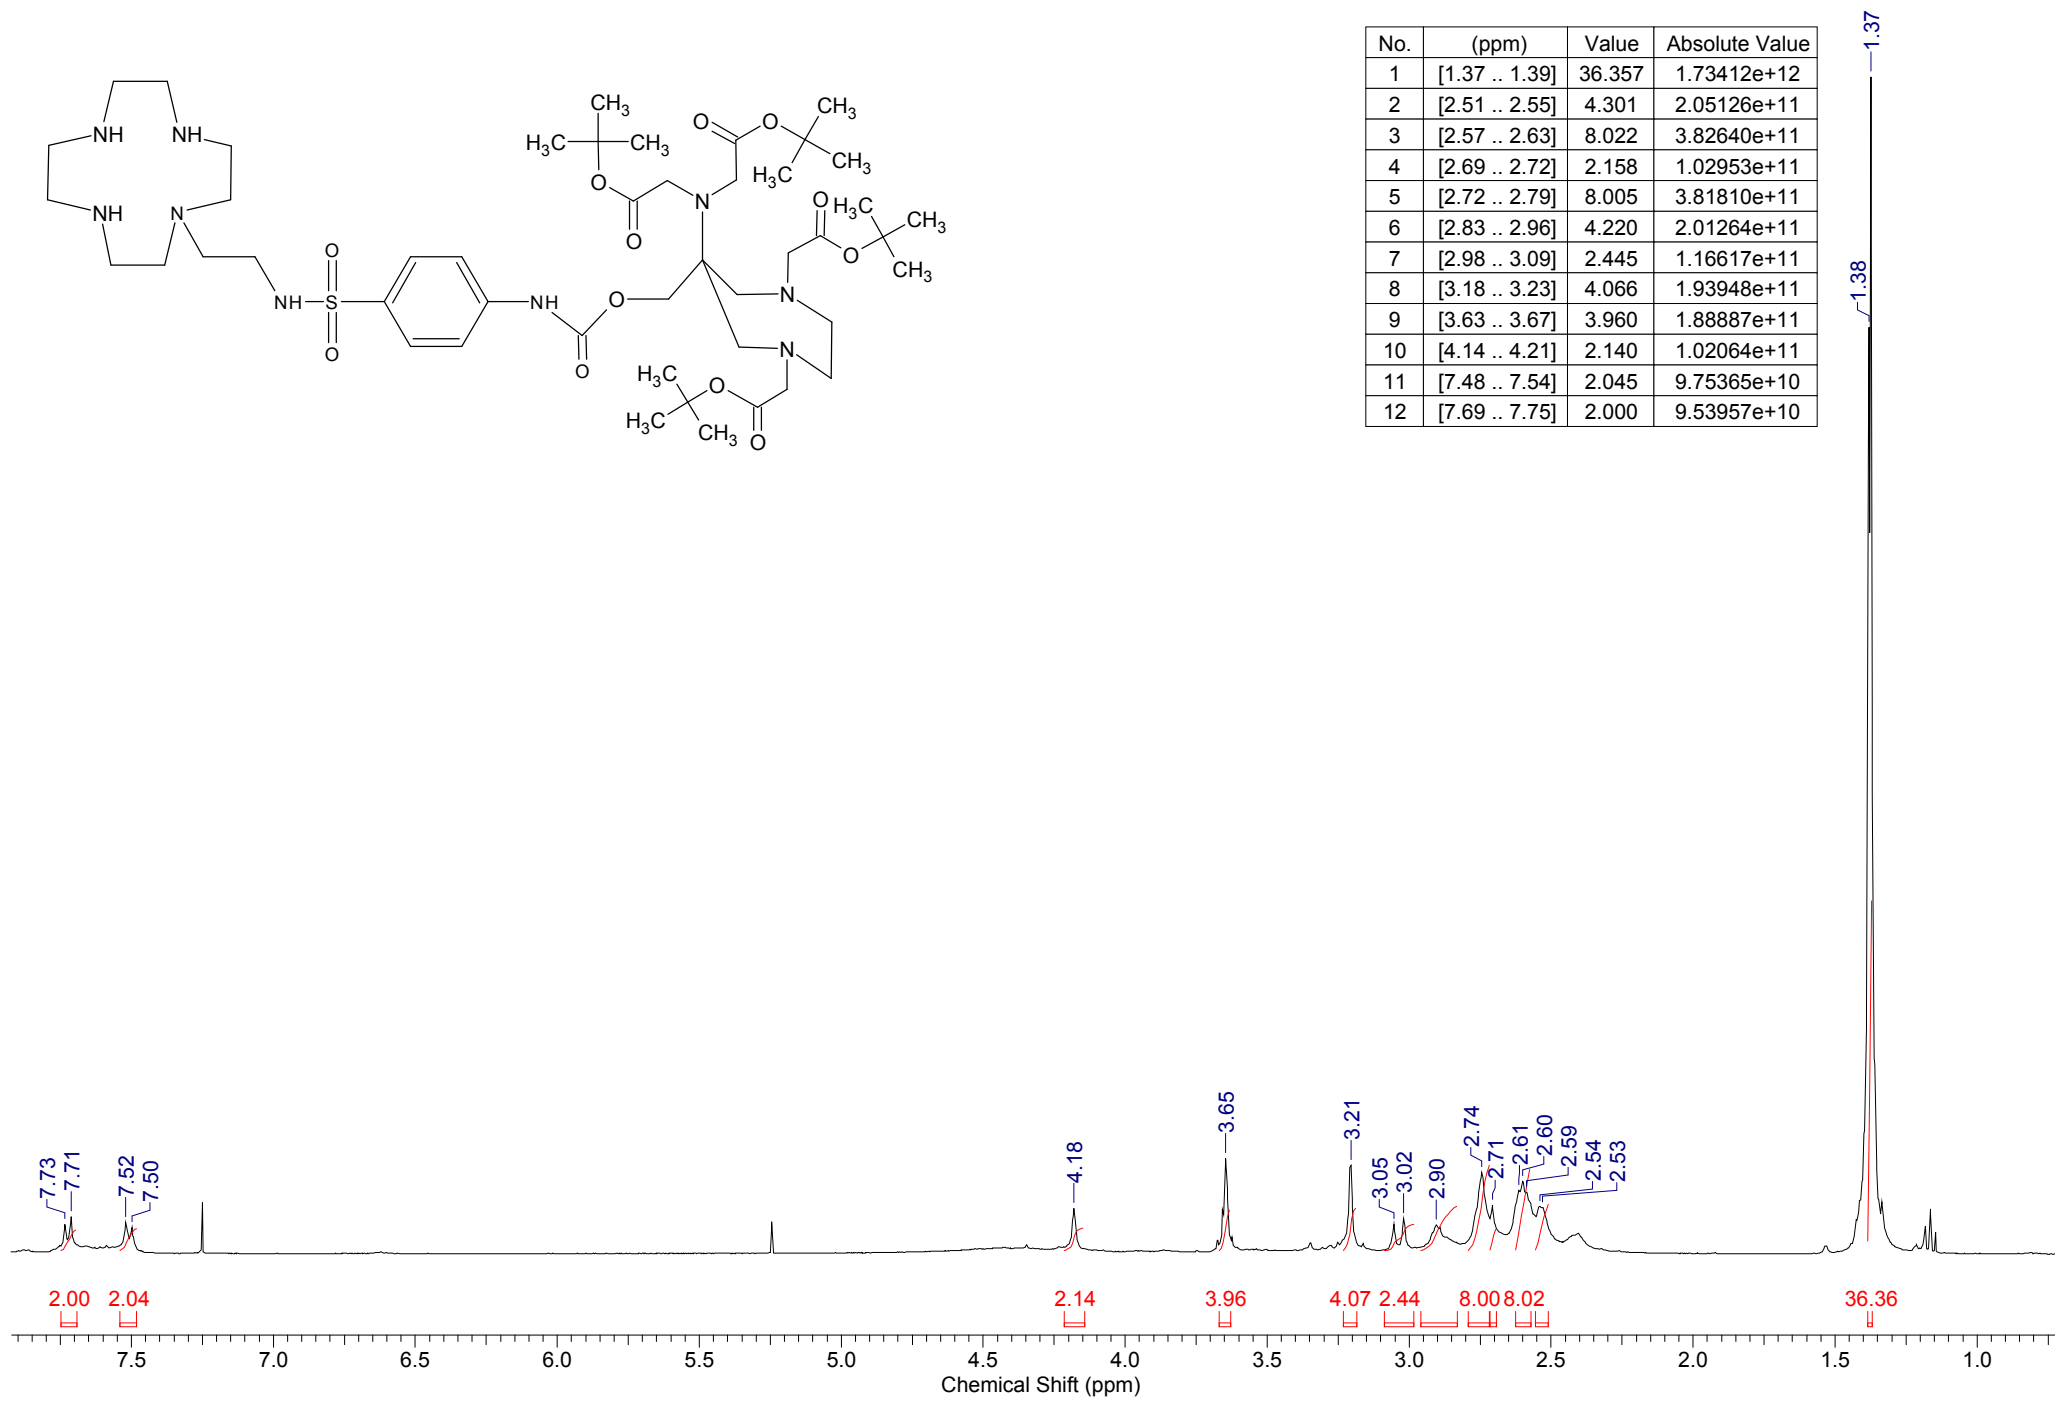

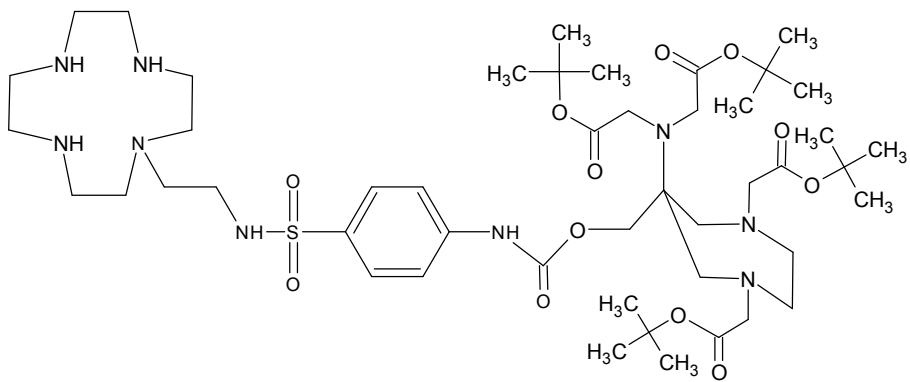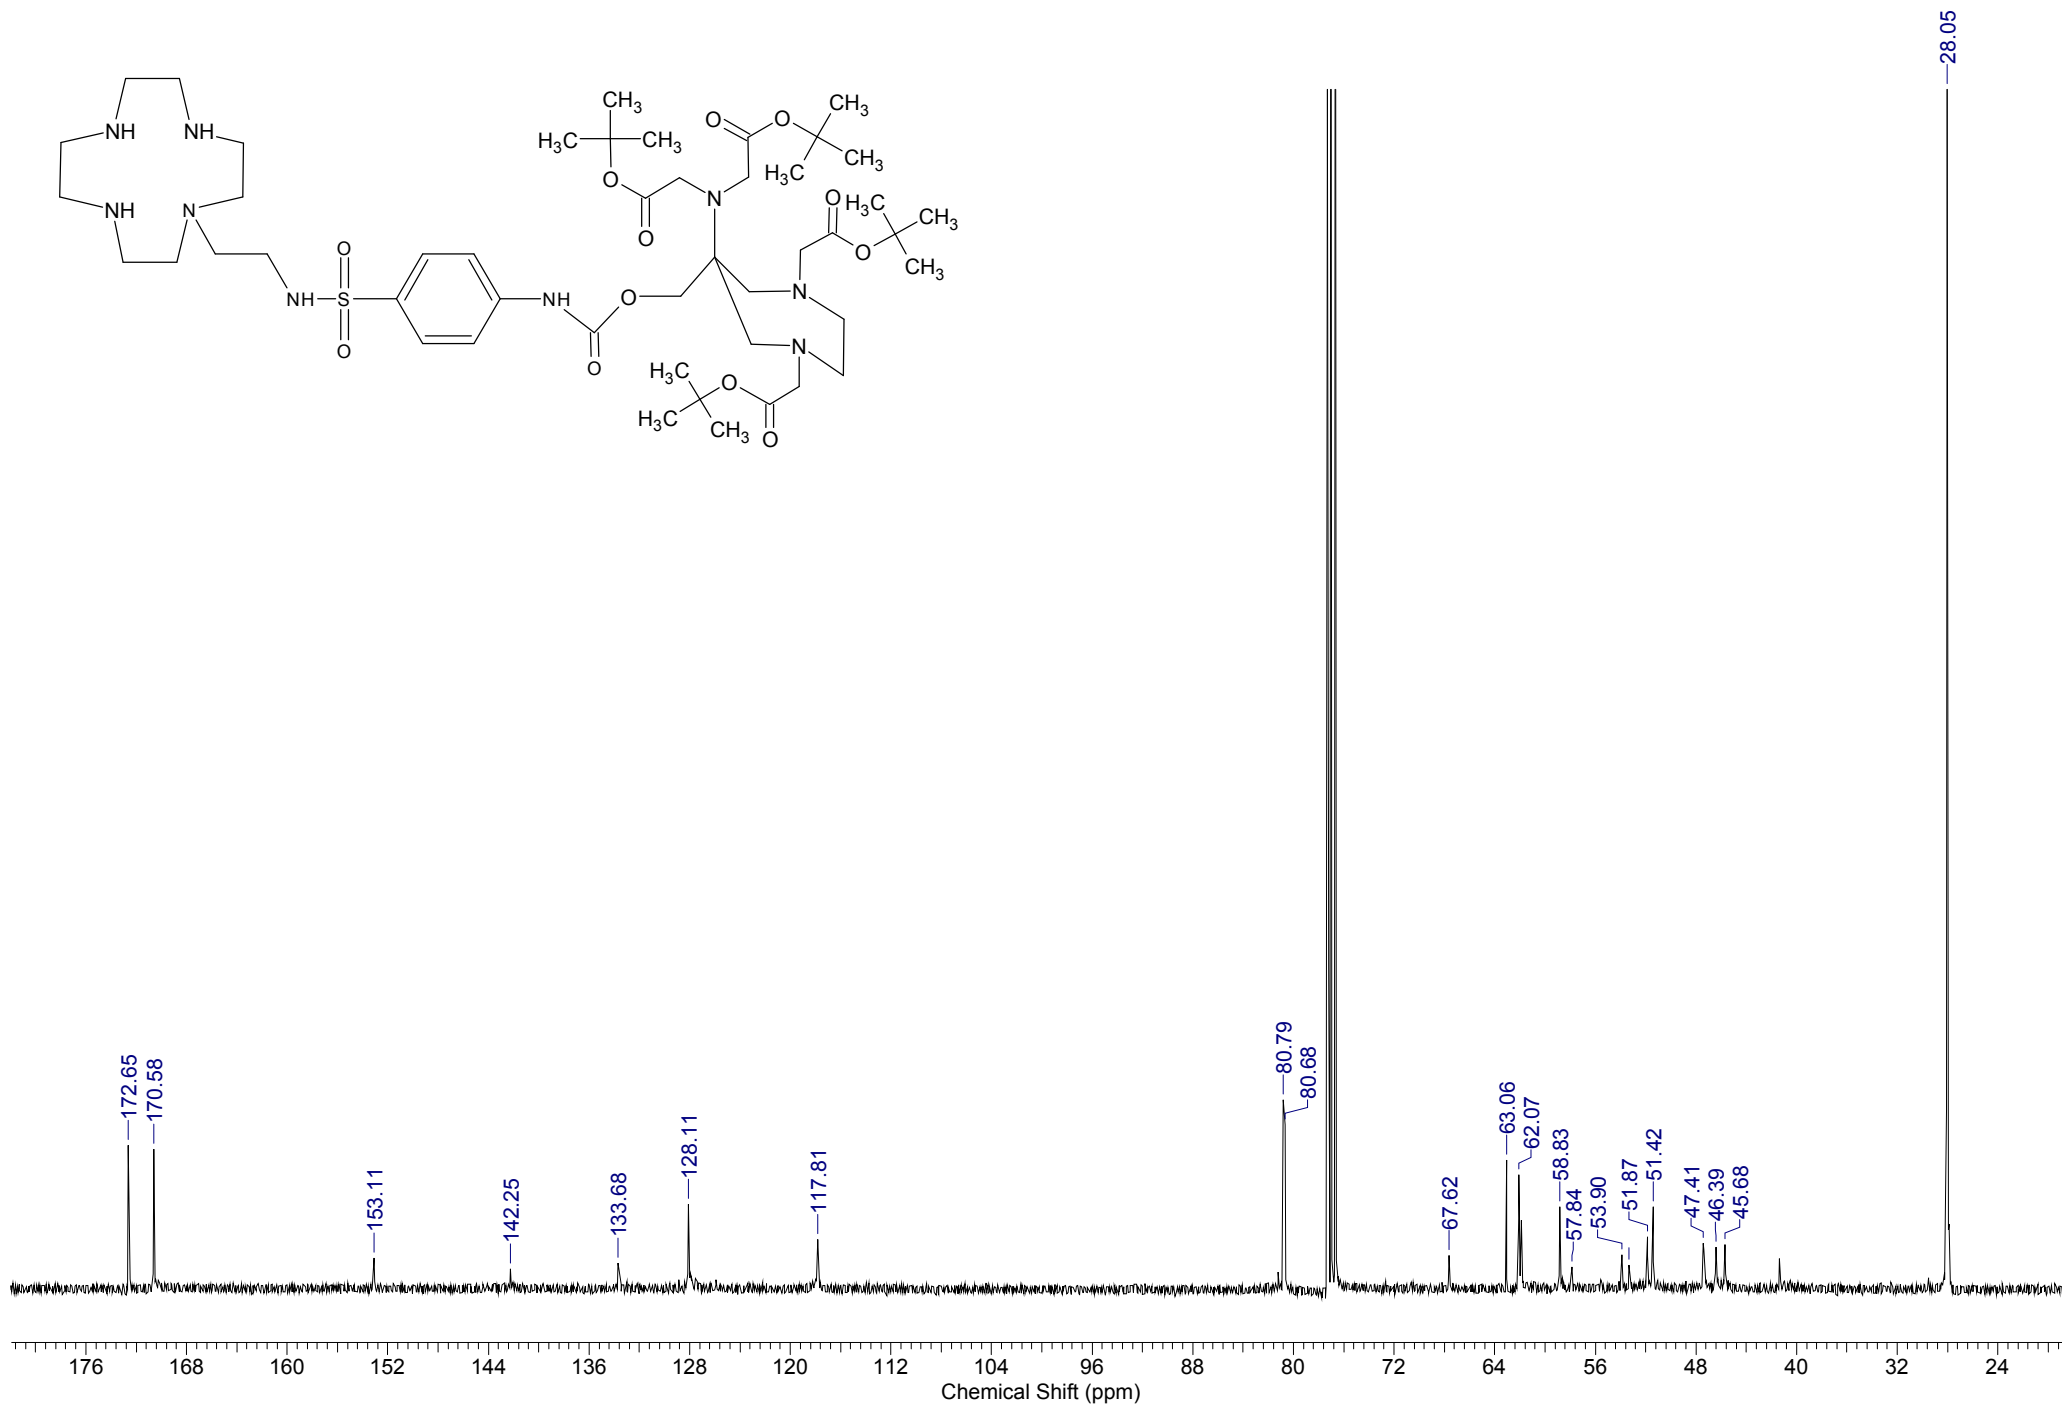

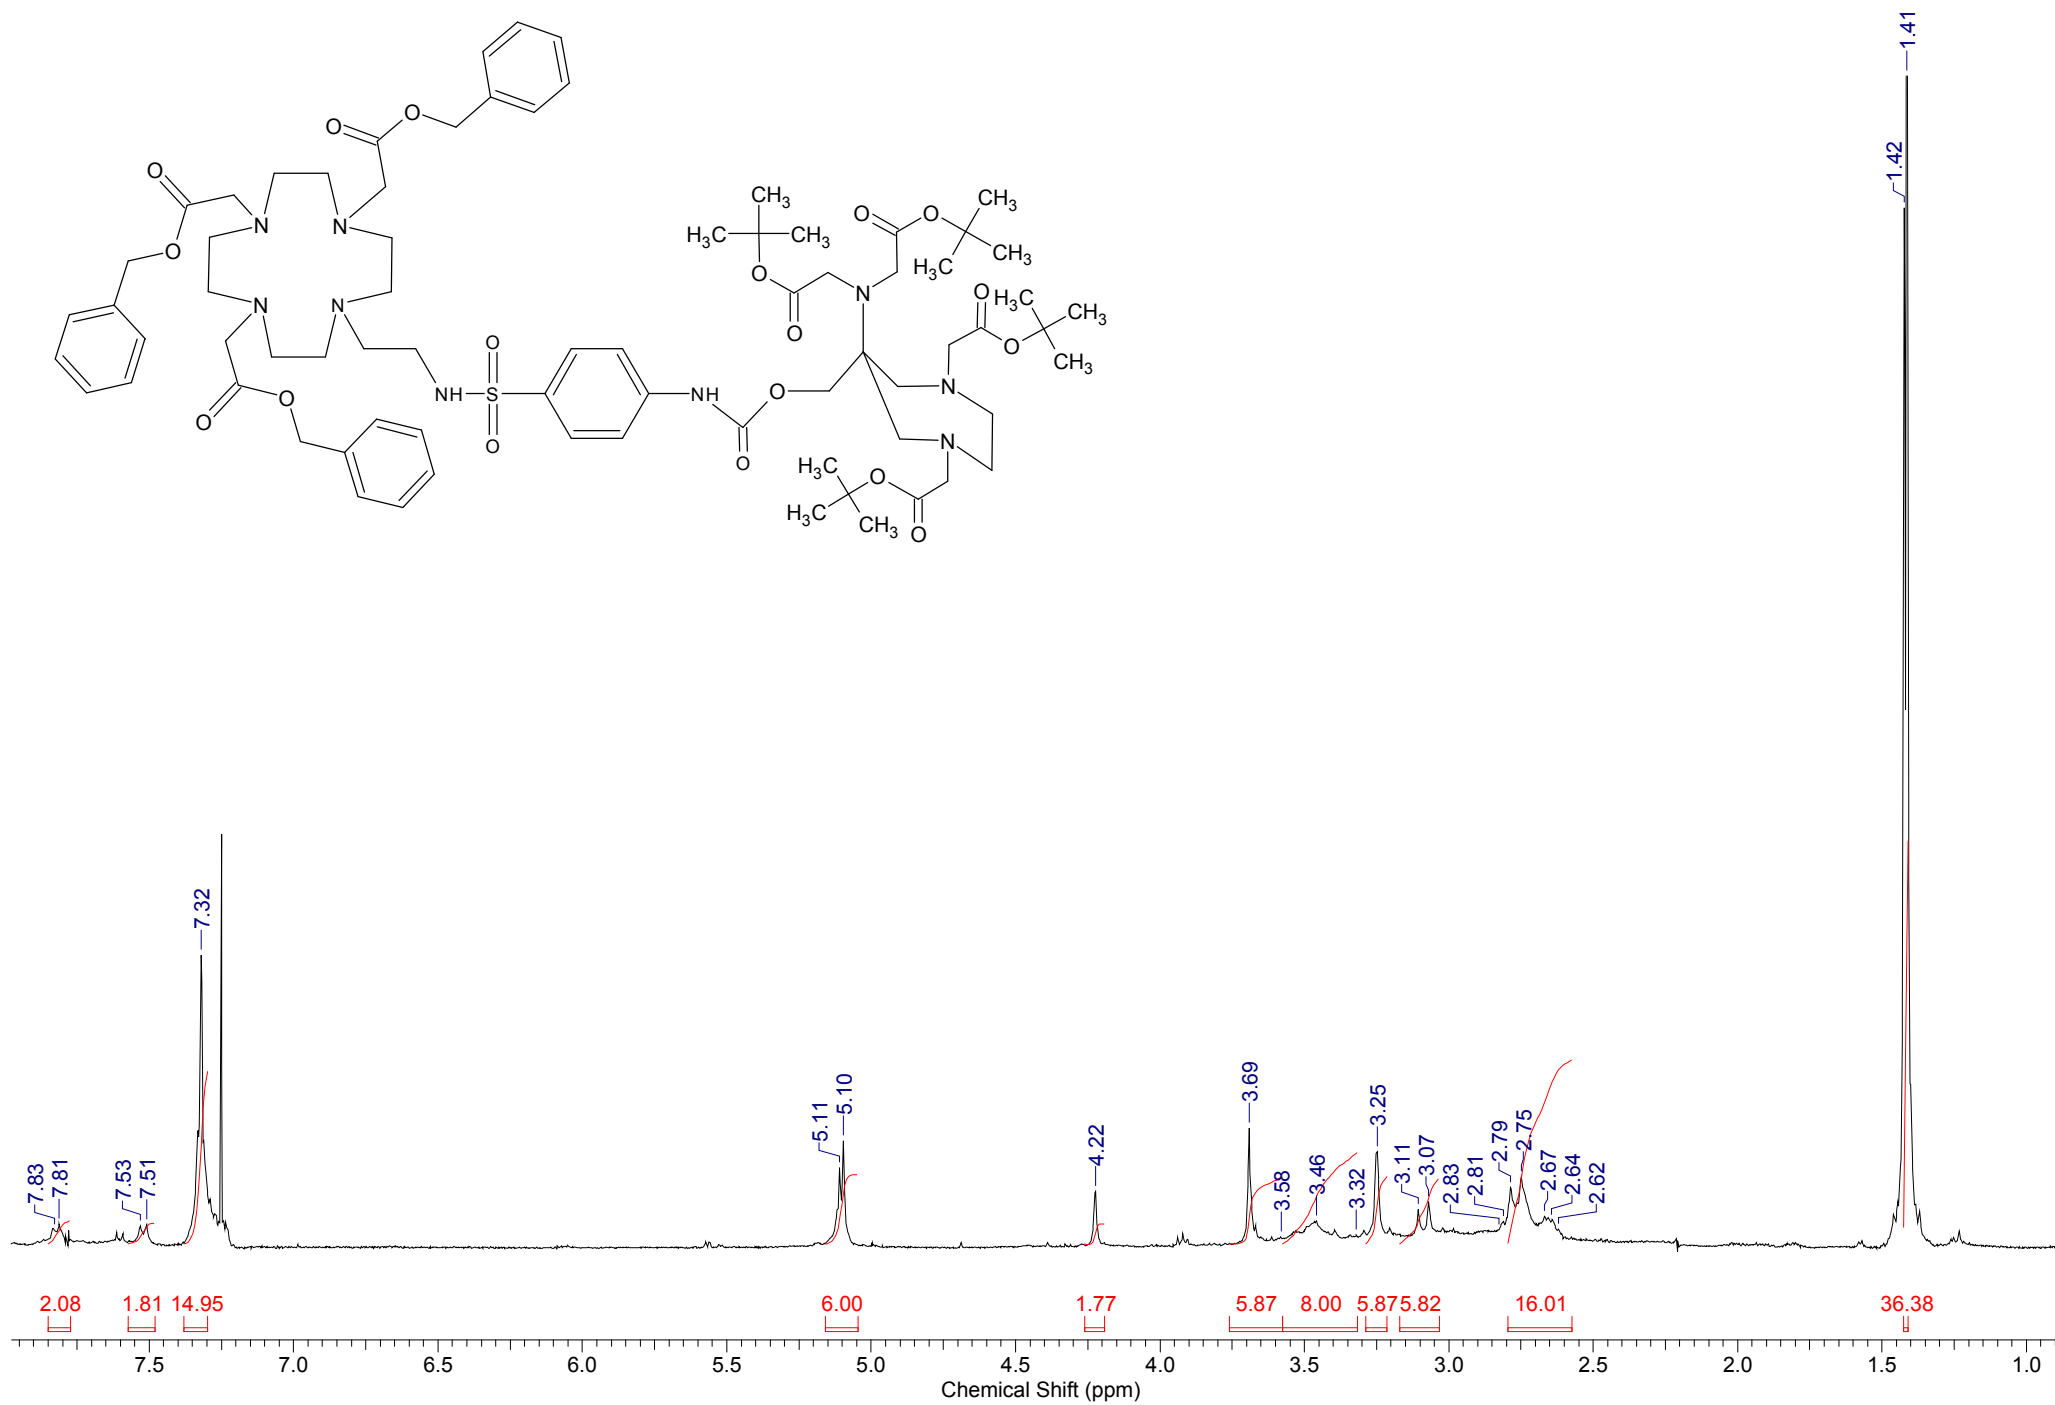

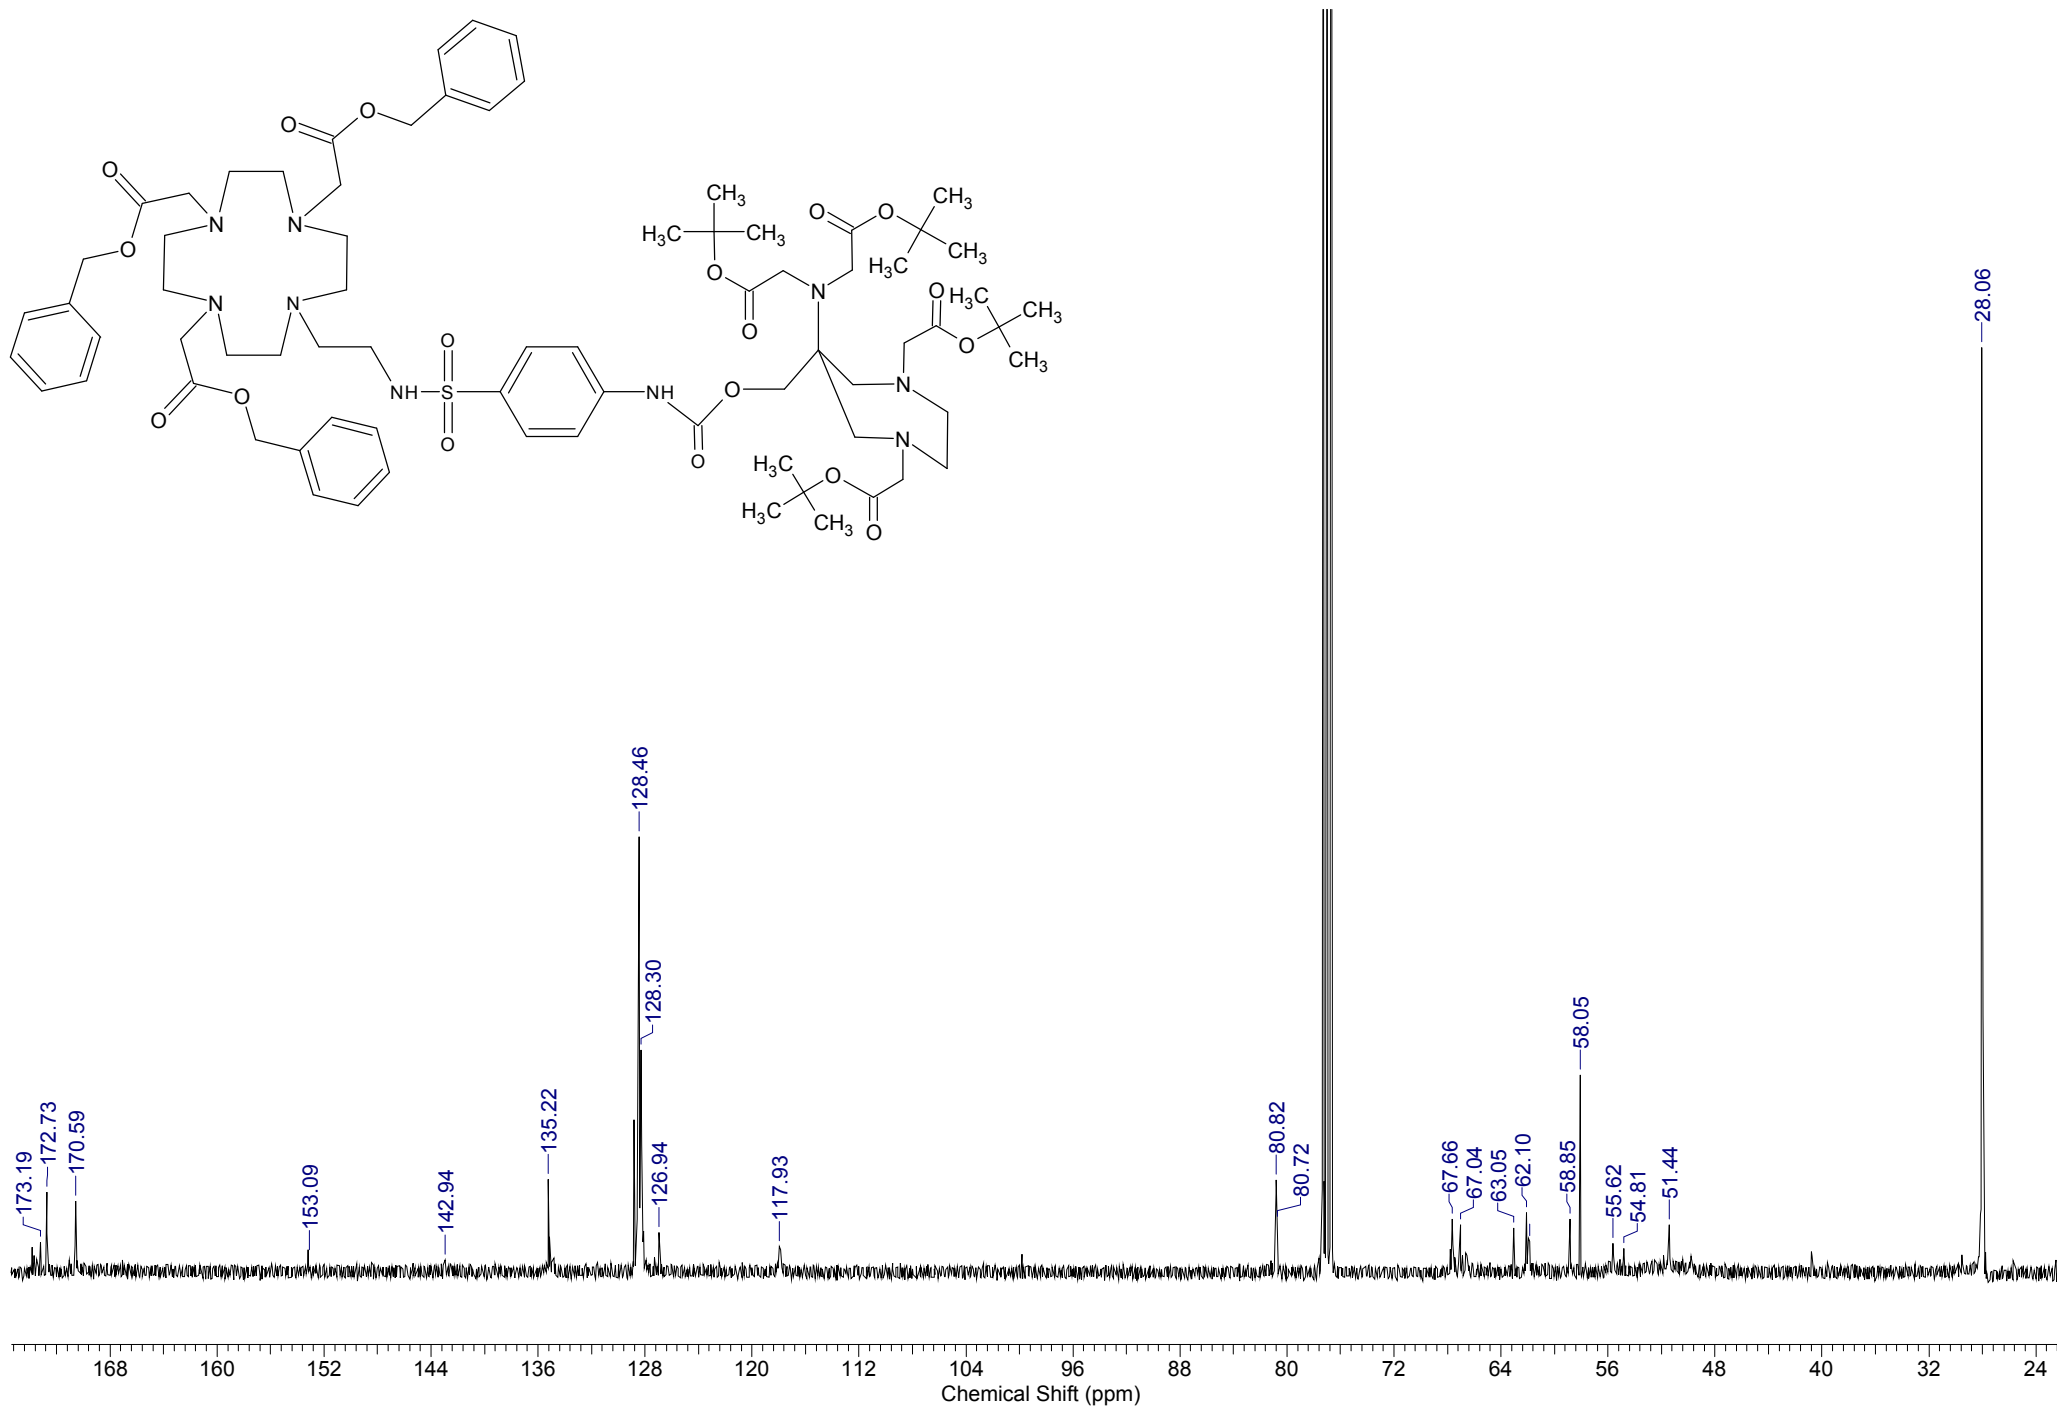

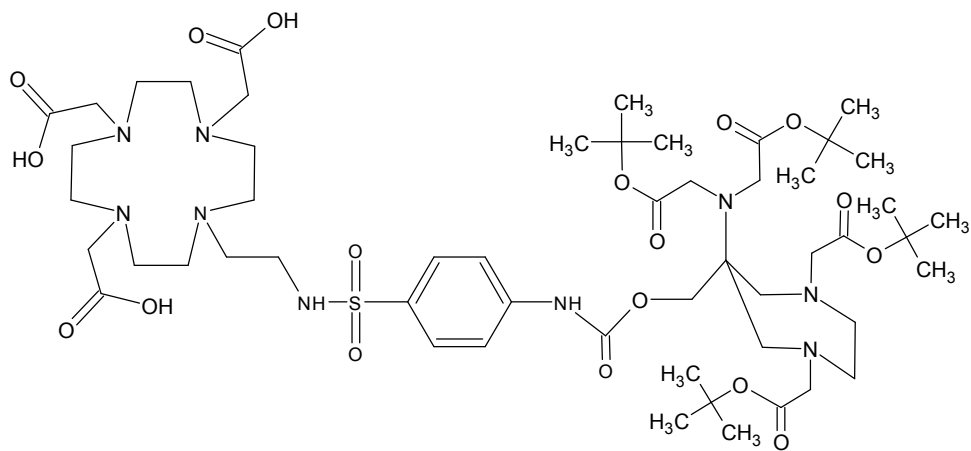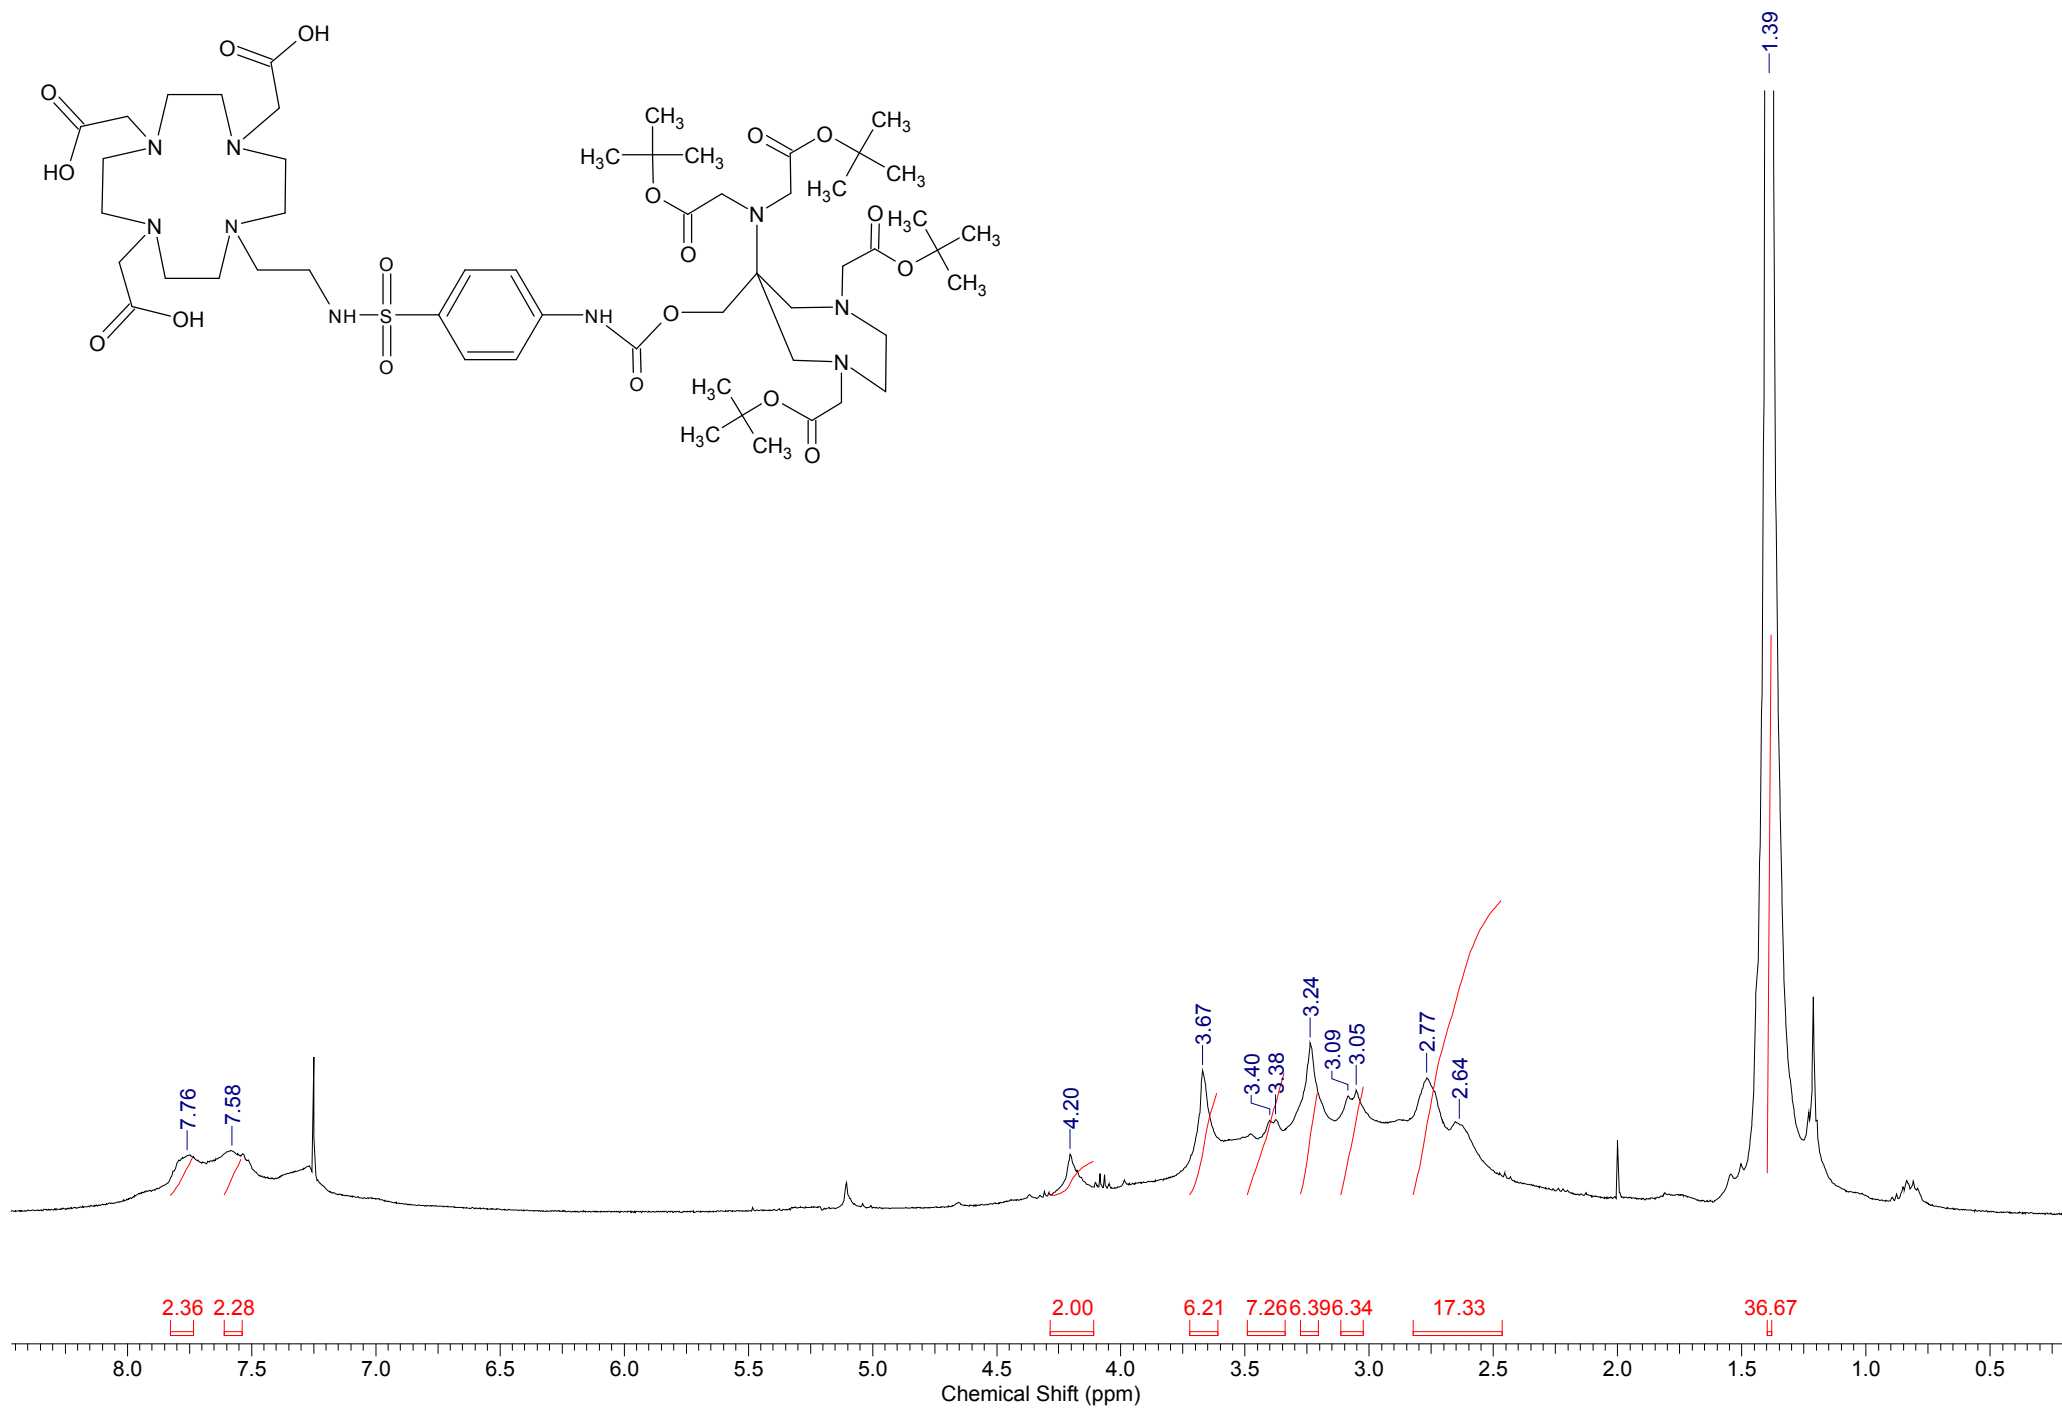

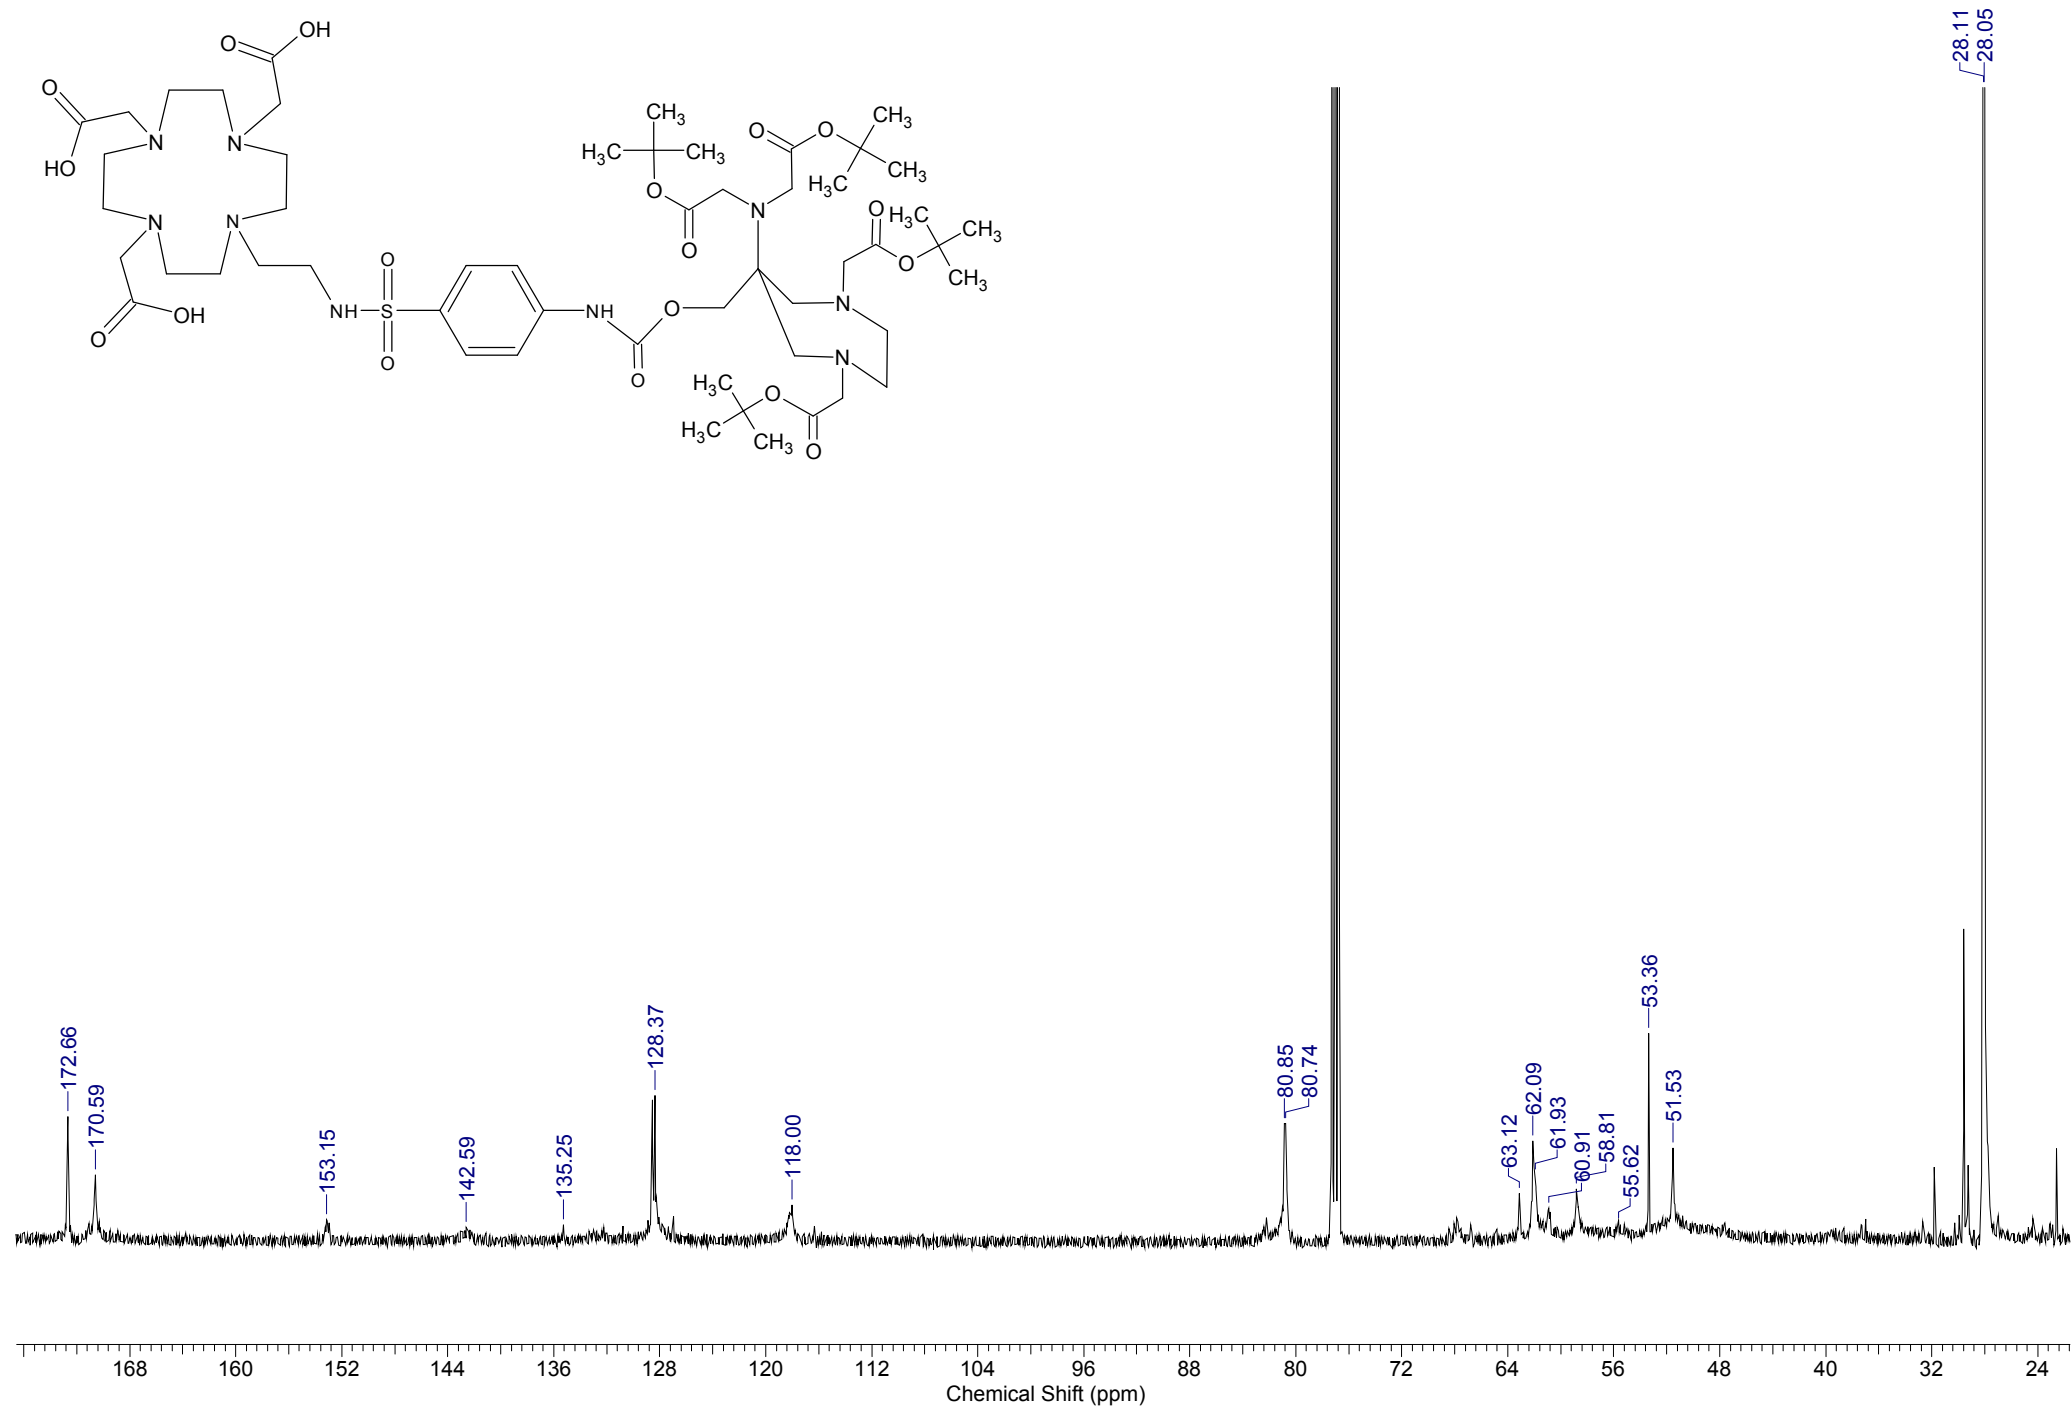

Supplement: c2ob27200h.pdf [file c2ob27200h.pdf]
